# Supplementary material for: The Genome of the Trinidadian Guppy, Poecilia reticulata, and Variation in the Guanapo Population
Source: PubMed Central journal article supplement (PMC5199103; doi:10.1371/journal.pone.0169087), 2016-12-29
Supplement: pone.0169087.s005.pdf [file pone.0169087.s005.pdf]

**SI Table. Overview of sequencing data used for assembling the female guppy genome.**

Raw data denotes sequencing yield after *phiX* removal and filtered data denotes sequence data after removing PCR duplicates. PE = Paired-end library, MP = Mate pair library, FM = Fosmid library.

| ID | Library insert size | Library Type | Raw Read length | Raw data in Gb | Filtered data in Gb | SRA Accession |
|----|---------------------|--------------|-----------------|----------------|---------------------|---------------|
| 1  | 240                 | PE           | 151             | 11.7           | 11.7                | SRR1171023    |
| 2  | 240                 | PE           | 136             | 11.9           | 11.9                | SRR1171023    |
| 3  | 270                 | PE           | 151             | 12.5           | 12.5                | SRR1171024    |
| 4  | 270                 | PE           | 151             | 12.2           | 11.2                | SRR1171024    |
| 5  | 270                 | PE           | 151             | 13.0           | 13.0                | SRR1171024    |
| 6  | 460                 | PE           | 151             | 11.5           | 11.5                | SRR1171025    |
| 7  | 460                 | PE           | 151             | 11.2           | 11.2                | SRR1171025    |
| 8  | 460                 | PE           | 151             | 5.2            | 5.2                 | SRR1171025    |
| 9  | 3000                | MP           | 151             | 10.0           | 6.3                 | SRR1171308    |
| 10 | 3000                | MP           | 151             | 10.7           | 9.5                 | SRR1171308    |
| 11 | 3000                | MP           | 151             | 10.9           | 2.9                 | SRR1171308    |
| 12 | 5500                | MP           | 151             | 12.8           | 6.4                 | SRR1171309    |
| 13 | 8000                | MP           | 151             | 8.8            | 9.5                 | SRR1171310    |
| 14 | 13000               | MP           | 151             | 11.4           | 3.7                 | SRR1171311    |
| 15 | 14000               | MP           | 151             | 8.5            | 1.9                 | SRR1171312    |
| 16 | 20000               | MP           | 151             | 13.9           | 6.2                 | SRR1171313    |
| 17 | 20000               | MP           | 151             | 10.8           | 4.4                 | SRR1171313    |
| 18 | 40000               | MP           | 151             | 11.9           | 2.8                 | SRR1171314    |
| 19 | 45-60000            | MP           | 151             | 11.7           | 2.9                 | SRR1171315    |
| 20 | 40000               | FM           | 101             | 14.4           | 3.0                 | SRR1171306    |
