# Supplementary material for: The Genome of the Trinidadian Guppy, Poecilia reticulata, and Variation in the Guanapo Population
Source: PubMed Central journal article supplement (PMC5199103; doi:10.1371/journal.pone.0169087), 2016-12-29
Supplement: pone.0169087.s006.pdf [file pone.0169087.s006.pdf]

**S2 Table. Overview of sequencing data used for population resequencing and population.**

Sequencing yield for high predation population individuals. Column 'Reads mapping to reference' refers to the percentage of reads mapping to the female genome. The column 'Uncovered in Mb' refers to the uncovered sequences in Mb after mapping the paired-end genomic libraries to the reference genome.

| ID   | Raw data<br>in Gb | Filtered data<br>in Gb | Coverage<br>per site | Reads mapping<br>reference (in %) | Uncovered<br>in Mb | SRA<br>Accession |
|------|-------------------|------------------------|----------------------|-----------------------------------|--------------------|------------------|
| GH11 | 11.4              | 9.9                    | 13.2                 | 91.4%                             | 82.7               | SRR1171699       |
| GH12 | 8.4               | 7.0                    | 9.6                  | 92.0%                             | 83.6               | SRR1171701       |
| GH13 | 12.4              | 10.7                   | 14.0                 | 90.2%                             | 87.9               | SRR1171702       |
| GH14 | 11.8              | 10.2                   | 13.6                 | 92.2%                             | 74.8               | SRR1171703       |
| GH15 | 11.7              | 10.0                   | 13.0                 | 89.5%                             | 76.2               | SRR1171704       |
| GH16 | 9.7               | 8.3                    | 8.5                  | 68.9%                             | 87.7               | SRR1171705       |
| GH17 | 9.6               | 8.2                    | 11.0                 | 91.3%                             | 83.8               | SRR1171707       |
| GH18 | 10.6              | 9.0                    | 12.0                 | 91.3%                             | 79.0               | SRR1171708       |
| GH19 | 10.6              | 8.7                    | 11.7                 | 91.7%                             | 75.4               | SRR1171709       |
| GH20 | 11.8              | 10.4                   | 13.8                 | 91.4%                             | 76.4               | SRR1171710       |
