# Supplementary material for: The Genome of the Trinidadian Guppy, Poecilia reticulata, and Variation in the Guanapo Population
Source: PubMed Central journal article supplement (PMC5199103; doi:10.1371/journal.pone.0169087), 2016-12-29
Supplement: pone.0169087.s007.pdf [file pone.0169087.s007.pdf]

**S3 Table. Rhodopsin and opsin genes found in the genome assembly.**

Note that the cluster of SWS2A, SWS2B, LWS-1, LWS-2, and LWS-3 on the Cumaná BAC 35E7 (HM540108) has been annotated in reverse order relative to chromosome [3].

| Guppy Opsin      | LG | NCBI Gene ID   | Position on scaffold (mRNA)  | GenBank Accession      | Reference |
|------------------|----|----------------|------------------------------|------------------------|-----------|
| RH2_1            | 5  | XP_008406984.1 | scaffold_31:5601938-5604011  | DQ234859.1             | [1]       |
| RH2_2            | 5  | XP_008406985.1 | scaffold_31:5616145-5620938  | DQ234858.1             | [1]       |
| LWS-1 (A180)     | 5  | XP_008408728.1 | scaffold_43:4295595-4297764  | HQ260675.1; HM540108.1 | [2, 3]    |
| LWS-2 (P180)     | 5  | XP_008408794.1 | scaffold_43:4280373-4290244  | AB748956.1; HM540108.1 | [3, 4]    |
| LWS-3 (S180)     | 5  | XP_008408727.1 | scaffold_43:4274724-4276879  | HQ260677.1; HM540108.1 | [2, 3]    |
| SWS2B            | 5  | XP_008408729.1 | scaffold_43:4306172-4308530  | DQ234860.1; HM540108.1 | [1, 3]    |
| SWS2A            | 5  | XP_008408730.1 | scaffold_43:4310261-4313196  | JF303638.1; HM540108.1 | [2, 3]    |
| LWS-4 (S180r)    | 21 | XP_008395693.1 | scaffold_19:2104249-2111012  | HQ260678.1; HM540107.1 | [2, 3]    |
| SWS1             | UN | XP_008399945.1 | scaffold_125:1382757-1384348 | DQ234861.1             | [1]       |
| RH-1 (Rhodopsin) | 7  | XP_008412214.1 | scaffold_1:6207362-6208968   | DQ912023.1             | [1]       |

- Hoffmann M, Tripathi N, Henz SR, Lindholm AK, Weigel D, Breden F, et al. Opsin gene duplication and diversification in the guppy, a model for sexual selection. *Proc Biol Sci.* 2007;274(1606):33-42. doi: 10.1098/rspb.2006.3707. PubMed PMID: 17015333; PubMed Central PMCID: PMC1679887.
- Laver CR, Taylor JS. RT-qPCR reveals opsin gene upregulation associated with age and sex in guppies (*Poecilia reticulata*) - a species with color-based sexual selection and 11 visual-opsin genes. *BMC Evol Biol.* 2011;11:81. Epub 2011/03/31. PubMed PMID: 21447186; PubMed Central PMCID: PMC3078887.
- Watson CT, Gray SM, Hoffmann M, Lubieniecki KP, Joy JB, Sandkam BA, et al. Gene duplication and divergence of long wavelength-sensitive opsin genes in the guppy, *Poecilia reticulata*. *J Mol Evol.* 2011;72(2):240-52. Epub 2010/12/21. doi: 10.1007/s00239-010-9426-z. PubMed PMID: 21170644.
- Tezuka A, Kasagi S, van Oosterhout C, McMullan M, Iwasaki WM, Kasai D, et al. Divergent selection for opsin gene variation in guppy (*Poecilia reticulata*) populations of Trinidad and Tobago. *Heredity (Edinb).* 2014;113(5):381-9. doi: 10.1038/hdy.2014.35. PubMed PMID: 24690753; PubMed Central PMCID: PMC4220713.
