# Supplementary material for: The Genome of the Trinidadian Guppy, Poecilia reticulata, and Variation in the Guanapo Population
Source: PubMed Central journal article supplement (PMC5199103; doi:10.1371/journal.pone.0169087), 2016-12-29
Supplement: pone.0169087.s008.pdf [file pone.0169087.s008.pdf]

**S4 Table. Predictions of small RNA loci using INFERNAL and predicted tRNAs and potential pseudogenes coding tRNAs using tRNA-SCAN.**

| Program   | Class                               | Number |
|-----------|-------------------------------------|--------|
| Infernal  | 5S rRNA                             | 15     |
|           | miRNA                               | 707    |
|           | RNase P                             | 4      |
|           | rRNA                                | 30     |
|           | snoRNA                              | 160    |
|           | snRNA                               | 88     |
|           | tRNA                                | 419    |
| tRNA-scan | tRNAs                               | 439    |
|           | Selenocysteine tRNAs (TCA)          | 3      |
|           | Possible suppressor tRNAs (CTA,TTA) | 1      |
|           | undetermined tRNAs                  | 65     |
|           | Predicted pseudogenes coding tRNAs  | 4186   |
