# Supplementary material for: The Genome of the Trinidadian Guppy, Poecilia reticulata, and Variation in the Guanapo Population
Source: PubMed Central journal article supplement (PMC5199103; doi:10.1371/journal.pone.0169087), 2016-12-29
Supplement: pone.0169087.s010.pdf [file pone.0169087.s010.pdf]

**S6 Table. Linkage group sizes after anchoring scaffolds.**

Linkage group Un contains all unanchored scaffolds.

| Linkage group | Length in Mb |
|---------------|--------------|
| 1             | 34.11        |
| 2             | 46.29        |
| 3             | 35.26        |
| 4             | 31.50        |
| 5             | 33.91        |
| 6             | 31.53        |
| 7             | 31.41        |
| 8             | 27.94        |
| 9             | 34.12        |
| 10            | 32.82        |
| 11            | 28.87        |
| 12            | 26.44        |
| 13            | 33.52        |
| 14            | 28.34        |
| 15            | 30.64        |
| 16            | 33.20        |
| 17            | 30.79        |
| 18            | 22.03        |
| 19            | 28.47        |
| 20            | 26.38        |
| 21            | 25.77        |
| 22            | 25.25        |
| 23            | 18.08        |
| Un            | 34.94        |
