# Supplementary material for: The Genome of the Trinidadian Guppy, Poecilia reticulata, and Variation in the Guanapo Population
Source: PubMed Central journal article supplement (PMC5199103; doi:10.1371/journal.pone.0169087), 2016-12-29
Supplement: pone.0169087.s011.pdf [file pone.0169087.s011.pdf]

**S7 Table. Protein coding genes related to (A) growth, (B) pigment pattern and (C) sex differentiation found on LG12.**

| <b>A. Genes related to growth</b>                    |                |                |                                                                        |           |
|------------------------------------------------------|----------------|----------------|------------------------------------------------------------------------|-----------|
| Scaffold                                             | NCBI mRNA      | NCBI protein   | Predicted protein                                                      | Reference |
| 10                                                   | XM_008423749.1 | XP_008421971.1 | BDNF/NT-3 growth factors receptor-like                                 | [1]       |
| 10                                                   | XM_008423561.1 | XP_008421783.1 | epidermal growth factor-like protein 7                                 | [2]       |
| 10                                                   | XM_008423514.1 | XP_008421736.1 | growth arrest-specific protein 1-like (GAS1)                           | [3]       |
| 10                                                   | XM_008423783.1 | XP_008422005.1 | growth/differentiation factor 7-like (GSDF)                            | [4]       |
| 10                                                   | XM_008423158.1 | XP_008421380.1 | Basic fibroblast growth factor receptor 1A-like (GHR1a)                | [5]       |
| 13                                                   | XM_008424055.1 | XP_008422277.1 | fibroblast growth factor 10-like                                       | [6]       |
| 188                                                  | XM_008424590.1 | XP_008422812.1 | teratocarcinoma-derived growth factor 1-like (TDGF1, one-eyed pinhead) | [7]       |
| 185                                                  | XM_008424758.1 | XP_008422980.1 | growth hormone receptor-like (GHR2)                                    | [5]       |
| <b>B. Genes related to pigment pattern formation</b> |                |                |                                                                        |           |
| 10                                                   | XM_008423759.1 | XP_008421981.1 | superkiller viralicidic activity 2-like 2 (skiv2l2)                    | [8]       |
| 10                                                   | XM_008423772.1 | XP_008421994.1 | SLC45A2 (aim1)                                                         | [9]       |
| 80                                                   | XM_008424603.1 | XP_008422825.1 | prepromelanin concentrating hormone (pro-MCH-like)                     | [10]      |
| 231                                                  | XM_008424833.1 | XP_008423055.1 | sepiapterin reductase (spra)                                           | [11]      |
| <b>C. Genes related to sex differentiation</b>       |                |                |                                                                        |           |
| 10                                                   | XM_008423078.1 | XP_008421300.1 | nuclear receptor subfamily 5 group A member 1b (NR5A1b, SF1)           | [12]      |
| 13                                                   | XM_008423879.1 | XP_008422101.1 | progesterin and adipoQ receptor family member 3-like                   | [13]      |
| 13                                                   | XM_008424014.1 | XP_008422236.1 | spermatid perinuclear RNA-binding protein                              | [14]      |
| 13                                                   | XM_008424087.1 | XP_008422309.1 | stAR-related lipid transfer protein 7                                  | [15]      |

|     |                |                |                                                                  |      |
|-----|----------------|----------------|------------------------------------------------------------------|------|
| 13  | XM_008424101.1 | XP_008422323.1 | germ cell-less homolog 1                                         | [16] |
| 13  | XM_008424116.1 | XP_008422338.1 | oxysterol-binding protein 2-like                                 | [17] |
| 13  | XM_008424492.1 | XP_008422714.1 | prolactin receptor                                               | [18] |
| 13  | XM_008424151.1 | XP_008422373.1 | prolactin-releasing peptide receptor-like                        | [19] |
| 188 | XM_008424583.1 | XP_008422805.1 | spindlin1-like (spin4, 1 of 4)                                   | [20] |
| 188 | XM_008424565.1 | XP_008422787.1 | one cut domain family member 2                                   | [21] |
| 185 | XM_008424751.1 | XP_008422973.1 | prostate androgen-regulated mucin-like protein 1 homolog (parm1) | [22] |
| 185 | XM_008424748.1 | XP_008422970.1 | 5-hydroxytryptamine receptor 1A-beta-like                        | [23] |
| 185 | XM_008424735.1 | XP_008422957.1 | growth arrest and DNA damage-inducible protein GADD45 gamma-like | [24] |

1. Germana A, Laura R, Montalbano G, Guerrera MC, Amato V, et al. (2010) Expression of brain-derived neurotrophic factor and TrkB in the lateral line system of zebrafish during development. *Cell Mol Neurobiol* 30: 787-793.
2. Shen MM, Schier AF (2000) The EGF-CFC gene family in vertebrate development. *Trends Genet* 16: 303-309.
3. Airaksinen MS, Holm L, Hatinen T (2006) Evolution of the GDNF family ligands and receptors. *Brain Behav Evol* 68: 181-190.
4. Myosho T, Otake H, Masuyama H, Matsuda M, Kuroki Y, et al. (2012) Tracing the emergence of a novel sex-determining gene in medaka, *Oryzias luzonensis*. *Genetics* 191: 163-170.
5. Ellens ER, Kittilson JD, Hall JA, Sower SA, Sheridan MA (2013) Evolutionary origin and divergence of the growth hormone receptor family: insight from studies on sea lamprey. *Gen Comp Endocrinol* 192: 222-236.
6. Liu F, Pogoda HM, Pearson CA, Ohyama K, Lohr H, et al. (2013) Direct and indirect roles of Fgf3 and Fgf10 in innervation and vascularisation of the vertebrate hypothalamic neurohypophysis. *Development* 140: 1111-1122.
7. Skinner MK, Schmidt M, Savenkova MI, Sadler-Riggleman I, Nilsson EE (2008) Regulation of granulosa and theca cell transcriptomes during ovarian antral follicle development. *Mol Reprod Dev* 75: 1457-1472.
8. Yang CT, Hindes AE, Hultman KA, Johnson SL (2007) Mutations in *gfpt1* and *skiv2l2* cause distinct stage-specific defects in larval melanocyte regeneration in zebrafish. *PLoS Genet* 3: e88.
9. Fukamachi S, Asakawa S, Wakamatsu Y, Shimizu N, Mitani H, et al. (2004) Conserved function of medaka pink-eyed dilution in melanin synthesis and its divergent transcriptional regulation in gonads among vertebrates. *Genetics* 168: 1519-1527.
10. Kawachi H, Baker BI (2004) Melanin-concentrating hormone signaling systems in fish. *Peptides* 25: 1577-1584.
11. Negishi S, Fujimoto K, Katoh S (2003) Localization of sepiapterin reductase in pigment cells of *Oryzias latipes*. *Pigment Cell Res* 16: 501-503.
12. Kuo MW, Postlethwait J, Lee WC, Lou SW, Chan WK, et al. (2005) Gene duplication, gene loss and evolution of expression domains in the vertebrate nuclear receptor NR5A (Ftz-F1) family. *Biochem J* 389: 19-26.

13. Thomas P, Pang Y (2012) Membrane progesterone receptors: evidence for neuroprotective, neurosteroid signaling and neuroendocrine functions in neuronal cells. *Neuroendocrinology* 96: 162-171.
14. Meikar O, Vagin VV, Chalmel F, Sostar K, Lardenois A, et al. (2014) An atlas of chromatoid body components. *RNA* 20: 483-495.
15. Miller WL (2013) Steroid hormone synthesis in mitochondria. *Mol Cell Endocrinol* 379: 62-73.
16. Cinalli RM, Lehmann R (2013) A spindle-independent cleavage pathway controls germ cell formation in *Drosophila*. *Nat Cell Biol* 15: 839-845.
17. Ramachandra RK, Lankford SE, Weber GM, Rexroad CE, 3rd, Yao J (2007) Identification of OORP-T, a novel oocyte-specific gene encoding a protein with a conserved oxysterol binding protein domain in rainbow trout. *Mol Reprod Dev* 74: 502-511.
18. Whittington CM, Wilson AB (2013) The role of prolactin in fish reproduction. *Gen Comp Endocrinol* 191: 123-136.
19. Watanabe S, Kaneko T (2010) Prolactin-releasing peptide receptor expressed in the pituitary in Mozambique tilapia *Oreochromis mossambicus*: an aspect of prolactin regulatory mechanisms. *Gen Comp Endocrinol* 167: 27-34.
20. Chew TG, Peaston A, Lim AK, Lorthongpanich C, Knowles BB, et al. (2013) A tudor domain protein SPINDLIN1 interacts with the mRNA-binding protein SERBPI and is involved in mouse oocyte meiotic resumption. *PLoS One* 8: e69764.
21. Gladden JM, Meyer BJ (2007) A ONECUT homeodomain protein communicates X chromosome dose to specify *Caenorhabditis elegans* sexual fate by repressing a sex switch gene. *Genetics* 177: 1621-1637.
22. Park JY, Jang H, Curry TE, Sakamoto A, Jo M (2013) Prostate androgen-regulated mucin-like protein 1: a novel regulator of progesterone metabolism. *Mol Endocrinol* 27: 1871-1886.
23. Loveland JL, Uy N, Maruska KP, Carpenter RE, Fernald RD (2014) Social status differences regulate the serotonergic system of a cichlid fish, *Astatotilapia burtoni*. *J Exp Biol* 217: 2680-2690.
24. Johnen H, Gonzalez-Silva L, Carramolino L, Flores JM, Torres M, et al. (2013) Gadd45g is essential for primary sex determination, male fertility and testis development. *PLoS One* 8: e58751.
