# Supplementary material for: The Genome of the Trinidadian Guppy, Poecilia reticulata, and Variation in the Guanapo Population
Source: PubMed Central journal article supplement (PMC5199103; doi:10.1371/journal.pone.0169087), 2016-12-29
Supplement: pone.0169087.s013.pdf [file pone.0169087.s013.pdf]

**S9 Table. Frequency of alleles different from the reference in resequencing populations (single nucleotide polymorphisms only).**

| Frequency of alleles | Number of changes compared to reference |
|----------------------|-----------------------------------------|
| 1                    | 944,963                                 |
| 2                    | 642,701                                 |
| 3                    | 481,457                                 |
| 4                    | 424,684                                 |
| 5                    | 360,200                                 |
| 6                    | 322,395                                 |
| 7                    | 265,579                                 |
| 8                    | 241,341                                 |
| 9                    | 205,397                                 |
| 10                   | 200,745                                 |
| 11                   | 150,375                                 |
| 12                   | 133,398                                 |
| 13                   | 112,790                                 |
| 14                   | 100,176                                 |
| 15                   | 85,856                                  |
| 16                   | 75,149                                  |
| 17                   | 60,858                                  |
| 18                   | 57,140                                  |
| 19                   | 46,520                                  |
| 20                   | 54,298                                  |
| SNPs total           | 4,966,022                               |
