# Supplementary material for: The Genome of the Trinidadian Guppy, Poecilia reticulata, and Variation in the Guanapo Population
Source: PubMed Central journal article supplement (PMC5199103; doi:10.1371/journal.pone.0169087), 2016-12-29
Supplement: pone.0169087.s014.pdf [file pone.0169087.s014.pdf]

**S10 Table. Number of single nucleotide polymorphisms per individual and ratio of heterozygous to homozygous SNPs.**

| ID   | No of SNPs | Ratio heterozygous to homozygous SNPs |
|------|------------|---------------------------------------|
| GH11 | 2,172,270  | 1.77                                  |
| GH12 | 1,937,937  | 1.46                                  |
| GH13 | 2,117,353  | 1.68                                  |
| GH14 | 2,243,913  | 1.89                                  |
| GH15 | 2,225,037  | 1.94                                  |
| GH16 | 2,089,162  | 1.62                                  |
| GH17 | 2,125,450  | 1.70                                  |
| GH18 | 2,164,406  | 1.71                                  |
| GH19 | 2,258,495  | 1.88                                  |
| GH20 | 2,237,011  | 1.97                                  |
