# Supplementary material for: The Genome of the Trinidadian Guppy, Poecilia reticulata, and Variation in the Guanapo Population
Source: PubMed Central journal article supplement (PMC5199103; doi:10.1371/journal.pone.0169087), 2016-12-29
Supplement: pone.0169087.s015.pdf [file pone.0169087.s015.pdf]

**S11 Table. Single nucleotide polymorphisms by type and region for resequencing data inferred by SnpEff.**

Note SNPs can be counted in two or more categories.

| Category/Impact |               | Number of changes |
|-----------------|---------------|-------------------|
| Coding          | Missense      | 173,485           |
|                 | Nonsense      | 2,520             |
|                 | Silent        | 247,674           |
| Noncoding       | Upstream 5'   | 1,676,362         |
|                 | Downstream 3' | 1,692,488         |
|                 | Intergenic    | 1,821,797         |
