# Supplementary material for: The Genome of the Trinidadian Guppy, Poecilia reticulata, and Variation in the Guanapo Population
Source: PubMed Central journal article supplement (PMC5199103; doi:10.1371/journal.pone.0169087), 2016-12-29
Supplement: pone.0169087.s016.pdf [file pone.0169087.s016.pdf]

**S12 Table. Selected published fish genome assemblies.**

Comparison of 10 different published fish genomes and the guppy genome. Chromosomes refer to whether the assembly is available as chromosomes from GENBANK.

| Species               | Organism name                 | Assembly size in Mb | Number Scaffolds | Scaffolds per Mb | L50 in Mb | Chromosomes | GenBank Assembly ID | Sequencing technology |
|-----------------------|-------------------------------|---------------------|------------------|------------------|-----------|-------------|---------------------|-----------------------|
| Amazon molly          | <i>Poecilia formosa</i>       | 749                 | 3,985            | 5.32             | 1.57      | no          | GCA_000485575.1     | Illumina              |
| Atlantic cod          | <i>Gadus morhua</i>           | 824                 | 427,427          | 518.72           | 0.39      | no          | GCA_000231765.1     | 454                   |
| Burton's mouthbrooder | <i>Haplochromis burtoni</i>   | 831                 | 8,001            | 9.63             | 1.19      | no          | GCA_000239415.1     | Illumina              |
| Coelacanth            | <i>Latimeria chalumnae</i>    | 2,860               | 22,818           | 7.98             | 0.92      | no          | GCA_000225785.1     | Illumina              |
| Guppy                 | <i>Poecilia reticulata</i>    | 732                 | 3,029            | 4.14             | 5.27      | yes         | GCA_000633615.2     | Illumina              |
| Mexican tetra         | <i>Astyanax mexicanus</i>     | 1,191               | 10,735           | 9.01             | 1.78      | no          | GCA_000372685.1     | Illumina              |
| Nile tilapia          | <i>Oreochromis niloticus</i>  | 928                 | 5,901            | 6.36             | 2.80      | no          | GCA_000188235.1     | Illumina              |
| Northern pike         | <i>Esox lucius</i>            | 878                 | 5,688            | 6.48             | 0.70      | yes         | GCA_000721915.1     | Illumina              |
| Platyfish             | <i>Xiphophorus maculatus</i>  | 730                 | 20,632           | 28.26            | 1.30      | no          | GCA_000241075.1     | 454, ABI 3730         |
| Spotted gar           | <i>Lepisosteus oculatus</i>   | 946                 | 2,106            | 2.23             | 6.93      | yes         | GCA_000242695.1     | Illumina              |
| Tongue sole           | <i>Cynoglossus semilaevis</i> | 470                 | 31,181           | 66.34            | 0.51      | yes         | GCA_000523025.1     | Illumina              |
