# Supplementary material for: The Genome of the Trinidadian Guppy, Poecilia reticulata, and Variation in the Guanapo Population
Source: PLoS One. 2016 Dec 29;11(12):e0169087. doi: 10.1371/journal.pone.0169087 (PMC5199103; doi:10.1371/journal.pone.0169087)
Supplement: S8 Table — (XLSX) [file pone.0169087.s012.xlsx]

## Sheet: Sheet1
S8 Table. Best hit protein-coding genes retrieved for male specific sequences.
Contig ID	GenBank ID	Contig length in bp	% Query Coverage	Protein length in amino acids	% Hit Coverage	Alignment Length	% Identity	Protein Annotation
c176_g1_i1 1466	gi|617458692|ref|XP_007571219.1|	1466	43.7926	617	34.684	214	99.5327	PREDICTED: protein fem-1 homolog A-like [Poecilia formosa]
c271_g1_i1 1051	gi|617509048|ref|XP_007542454.1|	1051	44.529	462	33.7662	156	98.0769	PREDICTED: zinc finger protein 358-like [Poecilia formosa]
c607_g1_i1 1021	gi|617481665|ref|XP_007576498.1|	1021	73.1636	879	31.3993	277	70.0361	PREDICTED: leucine-rich repeat-containing protein 8D-like [Poecilia formosa]; volume-regulated anion channel subunit LRRC8D-like
c699_g1_i1 1085	gi|617407736|ref|XP_007554425.1|	1085	43.9631	551	28.8566	159	99.3711	PREDICTED: suppressor of cytokine signaling 5-like [Poecilia formosa]
c1002_g1_i1 1618	gi|941795064|ref|XP_014326769.1|	1618	30.4079	508	24.2126	164	73.7805	PREDICTED: paired box protein Pax-7-like isoform X2 [Xiphophorus maculatus]
c1082_g1_i1 1661	gi|617426738|ref|XP_007560404.1|	1661	32.5105	435	41.3793	180	91.1111	PREDICTED: uncharacterized protein LOC103143703 [Poecilia formosa]
c1199_g1_i1 2080	gi|658834260|ref|XP_008418686.1|	2080	34.9038	334	72.7545	243	79.4239	PREDICTED: uncharacterized protein LOC103471450 isoform X1 [Poecilia reticulata]
c1206_g1_i1 1166	gi|617435552|ref|XP_007563316.1|	1166	55.3173	333	63.3634	215	94.4186	PREDICTED: lysophosphatidic acid receptor 6-like [Poecilia formosa]
c1275_g1_i1 1379	gi|551529731|ref|XP_005816328.1|	1379	30.2393	540	20.3704	139	78.4173	PREDICTED: stAR-related lipid transfer protein 13-like, partial [Xiphophorus maculatus]
c1283_g1_i1 1148	gi|617386678|ref|XP_007548173.1|	1148	36.8467	734	20.1635	148	70.9459	PREDICTED: uncharacterized protein LOC103135409 [Poecilia formosa]
c1295_g1_i1 1698	gi|548550802|ref|XP_005755085.1|	1698	31.2721	200	88.5	177	60.452	PREDICTED: GTPase IMAP family member 5-like [Pundamilia nyererei]
c1465_g1_i1 4122	gi|941776509|ref|XP_014323945.1|	4122	38.5735	794	56.0453	532	53.5714	PREDICTED: poly [ADP-ribose] polymerase 9-like [Xiphophorus maculatus]
c1510_g1_i1 1068	gi|617457163|ref|XP_007570694.1|	1068	66.0112	782	30.0512	235	98.2979	PREDICTED: centrosomal protein of 85 kDa-like isoform X3 [Poecilia formosa]
c1533_g1_i1 1245	gi|617472000|ref|XP_007575717.1|	1245	60	566	34.4523	249	75.9036	PREDICTED: bile salt-activated lipase-like [Poecilia formosa]
c1652_g1_i1 1226	gi|831478289|ref|XP_012716223.1|	1226	36.7047	731	20.5198	150	83.3333	PREDICTED: zinc finger and BTB domain-containing protein 22-like [Fundulus heteroclitus]
c1703_g1_i1 1135	gi|617379710|ref|XP_007546105.1|	1135	34.6256	1130	11.2389	131	80.1527	PREDICTED: uncharacterized protein LOC103134003 [Poecilia formosa]
c1717_g1_i1 1103	gi|617457264|ref|XP_007570729.1|	1103	33.1822	376	32.4468	122	99.1803	PREDICTED: WD repeat-containing protein 74 [Poecilia formosa]
c1770_g1_i1 1203	gi|831480426|ref|XP_012723895.1|	1203	36.9077	1186	12.5632	150	88	PREDICTED: SH3 and multiple ankyrin repeat domains protein 3-like [Fundulus heteroclitus]
c1836_g1_i1 1425	gi|617448817|ref|XP_007567840.1|	1425	30.3158	815	14.4785	144	72.9167	PREDICTED: heterogeneous nuclear ribonucleoprotein U [Poecilia formosa]
c2196_g1_i1 1068	gi|617490743|ref|XP_007578204.1|	1068	94.382	1356	24.8525	337	90.5045	PREDICTED: AT-rich interactive domain-containing protein 4A [Poecilia formosa]
c2287_g1_i1 1392	gi|617525290|ref|XP_007545199.1|	1392	55.1724	454	56.3877	256	91.7969	PREDICTED: paraneoplastic antigen Ma3 homolog, partial [Poecilia formosa]
c2521_g1_i1 2256	gi|617379171|ref|XP_007545952.1|	2256	34.3085	464	39.4397	258	66.2791	PREDICTED: procollagen C-endopeptidase enhancer 2-like [Poecilia formosa]
c2550_g1_i1 3104	gi|941800869|ref|XP_014327743.1|	3104	30.1546	657	46.1187	319	52.3511	PREDICTED: zinc finger protein 2 homolog [Xiphophorus maculatus]
c2577_g1_i1 1046	gi|617468298|ref|XP_007574488.1|	1046	82.6004	1733	16.6763	290	94.4828	PREDICTED: IQ motif and SEC7 domain-containing protein 2-like [Poecilia formosa]
c2586_g1_i1 1016	gi|617433880|ref|XP_007562769.1|	1016	49.6063	290	57.931	168	99.4048	PREDICTED: cyclin-dependent kinase 5 activator 2 [Poecilia formosa]
c2617_g1_i1 1040	gi|617449883|ref|XP_007568209.1|	1040	50.1923	306	56.8627	174	91.954	PREDICTED: uncharacterized protein LOC103149129 isoform X1 [Poecilia formosa]
c2650_g1_i1 1028	gi|617485580|ref|XP_007577150.1|	1028	61.5759	234	90.1709	211	95.2607	PREDICTED: heat shock protein beta-11-like [Poecilia formosa]
c2670_g1_i1 1144	gi|617472606|ref|XP_007575922.1|	1144	34.6154	211	62.5592	132	94.697	PREDICTED: tetranectin-like [Poecilia formosa]
c2686_g1_i1 1445	gi|617449390|ref|XP_007568045.1|	1445	42.1453	555	31.7117	203	76.8473	PREDICTED: fibronectin type III domain-containing protein 7-like [Poecilia formosa]
c2763_g1_i1 1506	gi|617387742|ref|XP_007548489.1|	1506	49.004	493	49.8986	246	99.187	PREDICTED: cis-aconitate decarboxylase-like [Poecilia formosa]
c2868_g1_i1 1257	gi|617524521|ref|XP_007544945.1|	1257	32.6969	333	31.2312	137	61.3139	PREDICTED: coiled-coil domain-containing protein 142 [Poecilia formosa]
c3020_g1_i1 1386	gi|617464297|ref|XP_007573113.1|	1386	40.2597	816	18.8725	186	75.8065	PREDICTED: nuclear GTPase SLIP-GC-like [Poecilia formosa]
c3095_g1_i1 1724	gi|617388320|ref|XP_007548669.1|	1724	31.1485	519	34.4894	179	96.648	PREDICTED: CDK5 and ABL1 enzyme substrate 1 isoform X2 [Poecilia formosa]
c3096_g1_i1 1099	gi|617520462|ref|XP_007544277.1|	1099	43.4031	1301	11.7602	159	55.3459	PREDICTED: uncharacterized protein LOC103132408, partial [Poecilia formosa]
c3197_g1_i1 1041	gi|658907999|ref|XP_008436725.1|	1041	62.536	339	66.3717	225	57.3333	PREDICTED: uncharacterized protein LOC103482381 [Poecilia reticulata]
c3300_g1_i2 1056	gi|658924154|ref|XP_008401766.1|	1056	40.625	517	30.3675	157	65.6051	PREDICTED: uncharacterized protein LOC103461223 [Poecilia reticulata]
c3351_g1_i1 1583	gi|551524888|ref|XP_005813926.1|	1583	44.1567	956	24.3724	233	99.5708	PREDICTED: muscle, skeletal receptor tyrosine-protein kinase [Xiphophorus maculatus]
c3360_g1_i1 1026	gi|617443224|ref|XP_007565878.1|	1026	69.0058	576	40.9722	236	99.5763	PREDICTED: B-cell lymphoma 6 protein-like [Poecilia formosa] (Zn-fimger Protein)
c3410_g1_i1 1466	gi|617402055|ref|XP_007552683.1|	1466	47.0668	506	45.8498	232	91.8103	PREDICTED: target of EGR1 protein 1 [Poecilia formosa]
c3496_g1_i1 1178	gi|617453418|ref|XP_007569411.1|	1178	69.5246	330	82.7273	273	95.9707	PREDICTED: trace amine-associated receptor 13c-like [Poecilia formosa]
c3562_g1_i1 1692	gi|658923399|ref|XP_008401414.1|	1692	38.6525	313	58.4665	218	60.5505	PREDICTED: carcinoembryonic antigen-related cell adhesion molecule 6-like [Poecilia reticulata]
c3569_g1_i1 1054	gi|941804496|ref|XP_014328264.1|	1054	52.3719	963	18.5877	191	50.2618	PREDICTED: trichohyalin-like [Xiphophorus maculatus]
c3589_g1_i1 1331	gi|617464052|ref|XP_007573036.1|	1331	42.3742	1253	15.2434	191	91.0995	PREDICTED: protein-methionine sulfoxide oxidase mical1-like isoform X1 [Poecilia formosa]
c3706_g1_i2 1200	gi|642119400|emb|CDQ65575.1|	1200	37.5	218	75.2294	166	62.0482	unnamed protein product [Oncorhynchus mykiss]
c3752_g1_i1 2505	gi|617375557|ref|XP_007541812.1|	2505	35.4491	425	69.6471	296	98.6486	PREDICTED: neuromedin-U receptor 1 [Poecilia formosa]
c3762_g1_i1 1153	gi|658853711|ref|XP_008409460.1|	1153	35.6461	360	38.0556	137	83.9416	PREDICTED: uncharacterized protein LOC103465985 [Poecilia reticulata]
c3846_g1_i1 1515	gi|551529160|ref|XP_005816045.1|	1515	85.1485	552	77.8986	430	95.1163	PREDICTED: protocadherin gamma-A2-like, partial [Xiphophorus maculatus]
c3890_g1_i1 1798	gi|617405697|ref|XP_007553782.1|	1798	33.2036	429	46.3869	199	95.4774	PREDICTED: uncharacterized protein LOC103139216 [Poecilia formosa]
c3987_g1_i1 1118	gi|617378210|ref|XP_007545647.1|	1118	92.576	1137	30.6948	349	89.1117	PREDICTED: round spermatid basic protein 1-like protein [Poecilia formosa]
c4081_g1_i1 1259	gi|617490283|ref|XP_007578046.1|	1259	77.6807	653	49.9234	326	89.2638	PREDICTED: interleukin-2 receptor subunit beta-like [Poecilia formosa]
c4086_g1_i1 1451	gi|617435144|ref|XP_007563187.1|	1451	72.1571	350	100	350	92.2857	PREDICTED: lysophosphatidic acid receptor 6-like [Poecilia formosa]
c4093_g1_i1 1394	gi|617470793|ref|XP_007575336.1|	1394	43.6872	658	27.2036	203	85.2217	PREDICTED: mitogen-activated protein kinase kinase kinase 2 isoform X1 [Poecilia formosa]
c4105_g1_i1 1705	gi|551524072|ref|XP_005813521.1|	1705	49.7947	310	84.8387	283	52.6502	PREDICTED: E3 ubiquitin-protein ligase TRIM21-like [Xiphophorus maculatus]
c4270_g1_i1 1262	gi|551489966|ref|XP_005796555.1|	1262	38.0349	1196	13.3779	160	89.375	PREDICTED: CUB domain-containing protein 1 [Xiphophorus maculatus]
c4298_g2_i1 1113	gi|617417695|ref|XP_007557442.1|	1113	55.5256	380	54.2105	206	98.0583	PREDICTED: heparan sulfate glucosamine 3-O-sulfotransferase 6 [Poecilia formosa]
c4394_g1_i1 1191	gi|617508013|ref|XP_007542113.1|	1191	46.0957	324	56.4815	183	92.8962	PREDICTED: trace amine-associated receptor 13c-like [Poecilia formosa]
c4422_g1_i1 1470	gi|736185474|ref|XP_010769948.1|	1470	30	553	26.4014	147	72.7891	PREDICTED: uncharacterized protein LOC104945916 [Notothenia coriiceps]
c4454_g1_i1 1071	gi|736182175|ref|XP_010769013.1|	1071	48.7395	157	79.6178	174	67.8161	PREDICTED: transformation/transcription domain-associated protein-like, partial [Notothenia coriiceps]
c4468_g1_i1 1117	gi|617462772|ref|XP_007572593.1|	1117	53.9839	304	66.1184	201	92.0398	PREDICTED: olfactory receptor 11A1-like [Poecilia formosa]
c4483_g1_i1 1038	gi|658837947|ref|XP_008394921.1|	1038	50.8671	293	60.0683	176	77.8409	PREDICTED: trace amine-associated receptor 13c-like [Poecilia reticulata]
c4498_g1_i1 2538	gi|929129294|ref|XP_013982414.1|	2538	84.1608	906	78.5872	715	63.3566	PREDICTED: uncharacterized protein LOC106562215 [Salmo salar]
c4514_g1_i1 1017	gi|551494791|ref|XP_005798960.1|	1017	46.9027	213	74.6479	159	97.4843	PREDICTED: partner of Y14 and mago isoform X1 [Xiphophorus maculatus]
c4524_g1_i1 1094	gi|617521092|ref|XP_007544480.1|	1094	77.0567	578	45.5017	283	54.7703	PREDICTED: uncharacterized protein LOC103132609 [Poecilia formosa] (Retrotransposon-derived protein)
c4526_g1_i1 1022	gi|941821372|ref|XP_014331076.1|	1022	41.0959	737	15.1967	140	67.8571	PREDICTED: extracellular calcium-sensing receptor-like, partial [Xiphophorus maculatus]
c4588_g1_i1 1740	gi|617446629|ref|XP_007567085.1|	1740	42.931	581	42.8571	249	95.9839	PREDICTED: zinc finger protein 600-like isoform X2 [Poecilia formosa]
c4605_g1_i1 1705	gi|617470799|ref|XP_007575339.1|	1705	44.3402	766	29.5039	252	83.3333	PREDICTED: uncharacterized protein LOC103154109 [Poecilia formosa]
c4647_g1_i1 1068	gi|551527668|ref|XP_005815306.1|	1068	36.7978	599	21.8698	131	91.6031	PREDICTED: F-box only protein 34-like [Xiphophorus maculatus]
c4672_g1_i1 1064	gi|928057192|ref|XP_013877947.1|	1064	38.0639	264	53.7879	142	64.0845	PREDICTED: uncharacterized protein LOC106527570 [Austrofundulus limnaeus] (reverse transcriptase/ribonuclease H/putative methyltransferase)
c4680_g1_i1 1141	gi|617441641|ref|XP_007565304.1|	1141	57.0552	493	38.9452	217	68.6636	PREDICTED: scavenger receptor cysteine-rich type 1 protein M130-like isoform X1 [Poecilia formosa]
c4690_g1_i1 1086	gi|617414329|ref|XP_007556436.1|	1086	85.9116	473	65.7505	311	97.1061	PREDICTED: putative GPI-anchored protein PB15E9.01c [Poecilia formosa]
c4722_g1_i1 1954	gi|617470038|ref|XP_007575074.1|	1954	82.5998	717	68.8982	547	73.4918	PREDICTED: enolase-phosphatase E1-like [Poecilia formosa]
c4796_g1_i1 1899	gi|597788822|ref|XP_007257817.1|	1899	53.7125	529	64.4612	341	91.2023	PREDICTED: uncharacterized protein LOC103027249 [Astyanax mexicanus]
c4801_g1_i1 2128	gi|551517022|ref|XP_005810013.1|	2128	30.1692	537	40.5959	218	87.6147	PREDICTED: crossover junction endonuclease EME1 [Xiphophorus maculatus]
c4809_g1_i1 1381	gi|658876546|ref|XP_008421285.1|	1381	42.3606	342	61.1111	209	51.6746	PREDICTED: uncharacterized protein LOC103473106 isoform X2 [Poecilia reticulata]
c4817_g1_i1 2845	gi|617483196|ref|XP_007577025.1|	2845	54.5167	764	67.9319	523	86.4245	PREDICTED: uncharacterized protein LOC103155313 [Poecilia formosa]
c4891_g1_i1 1934	gi|831473856|ref|XP_012713750.1|	1934	87.4871	873	64.6048	566	88.8693	PREDICTED: uncharacterized protein LOC105922370 [Fundulus heteroclitus]
c4904_g1_i1 1203	gi|617443462|ref|XP_007565970.1|	1203	76.3092	481	63.6175	306	96.4052	PREDICTED: protocadherin gamma-B7-like [Poecilia formosa]
c4926_g1_i1 2630	gi|617441284|ref|XP_007565180.1|	2630	63.308	554	100	555	92.2523	PREDICTED: tripartite motif-containing protein 16-like [Poecilia formosa]
c4973_g1_i1 1304	gi|617404894|ref|XP_007553558.1|	1304	34.9693	888	16.8919	152	96.7105	PREDICTED: protein bicaudal D homolog 2-like [Poecilia formosa]
c5020_g1_i1 1410	gi|317419716|emb|CBN81752.1|	1410	99.7872	1450	32.4138	470	67.6596	Pol polyprotein [Dicentrarchus labrax] (Retrotransposable element)
c5060_g1_i1 1348	gi|941820762|ref|XP_014331001.1|	1348	46.5134	1437	14.4746	209	83.7321	PREDICTED: collagen alpha-3(VI) chain-like, partial [Xiphophorus maculatus]
c5064_g1_i1 2033	gi|617504017|ref|XP_007541456.1|	2033	41.3182	502	34.8606	281	55.8719	PREDICTED: coagulation factor X-like [Poecilia formosa]
c5066_g1_i1 1154	gi|929115499|ref|XP_014069201.1|	1154	53.8128	672	30.6548	209	73.6842	PREDICTED: uncharacterized protein LOC106612523 [Salmo salar]
c5132_g1_i1 2111	gi|617464709|ref|XP_007573260.1|	2111	69.2089	854	53.63	487	85.2156	PREDICTED: GTPase IMAP family member 8-like [Poecilia formosa]
c5136_g2_i1 2143	gi|617516295|ref|XP_007543525.1|	2143	45.7769	567	57.672	327	79.5107	PREDICTED: heat shock 70 kDa protein 12A-like [Poecilia formosa]
c5159_g1_i1 1488	gi|808869994|gb|KKF19921.1|	1488	87.2984	1388	31.0519	434	65.4378	Retrotransposable element Tf2 protein type 1 [Larimichthys crocea]
c5237_g1_i1 1272	gi|617435659|ref|XP_007563348.1|	1272	79.4811	1321	25.6624	339	94.3953	PREDICTED: A-kinase anchor protein 2-like isoform X1 [Poecilia formosa]
c5259_g1_i1 2678	gi|317419141|emb|CBN81178.1|	2678	32.823	1618	18.665	302	69.2053	Pol polyprotein [Dicentrarchus labrax] (Retrotransposable element Tf2)
c5317_g1_i1 2007	gi|617469984|ref|XP_007575057.1|	2007	63.2287	1802	23.4184	423	90.7801	PREDICTED: coiled-coil domain-containing protein 141 [Poecilia formosa]
c5321_g1_i1 1236	gi|542254587|ref|XP_005463034.1|	1236	99.7573	1501	27.3817	411	89.0511	PREDICTED: uncharacterized protein LOC102081790 [Oreochromis niloticus]
c5356_g1_i1 1365	gi|657598905|ref|XP_008304248.1|	1365	90.7692	1232	33.6039	420	72.8571	PREDICTED: LOW QUALITY PROTEIN: uncharacterized protein LOC103375707 [Stegastes partitus] (Retrovirus-related Pol polyprotein from transposon)
c5434_g1_i1 1024	gi|617467230|ref|XP_007574132.1|	1024	53.9062	694	26.513	184	84.7826	PREDICTED: uncharacterized protein LOC103153234 [Poecilia formosa] (Pol polyprotein)
c5449_g1_i2 1661	gi|657558729|ref|XP_008283360.1|	1661	59.2414	606	54.6205	331	87.3112	PREDICTED: LOW QUALITY PROTEIN: general transcription factor II-I repeat domain-containing protein 2-like [Stegastes partitus]
c5469_g1_i1 2272	gi|941808252|ref|XP_014329011.1|	2272	34.7271	284	92.6056	263	88.5932	PREDICTED: olfactory receptor 4K17-like [Xiphophorus maculatus]
c5532_g1_i1 1616	gi|617403765|ref|XP_007553208.1|	1616	57.9208	595	60.6723	361	67.867	PREDICTED: MAR-binding filament-like protein 1-1 [Poecilia formosa]
c5533_g1_i1 1390	gi|617516936|ref|XP_007543740.1|	1390	32.3741	419	26.969	150	72	PREDICTED: CST complex subunit CTC1-like [Poecilia formosa]
c5561_g1_i1 3037	gi|939318254|ref|XP_014263919.1|	3037	38.6236	2208	17.5725	394	57.1066	PREDICTED: uncharacterized protein LOC101486585 [Maylandia zebra]
c5566_g2_i1 3339	gi|658863944|ref|XP_008414793.1|	3339	33.4232	346	96.8208	372	61.2903	PREDICTED: apolipoprotein L3-like [Poecilia reticulata]
c5578_g1_i1 2667	gi|808858570|gb|KKF10928.1|	2667	33.9708	563	53.8188	313	55.5911	hypothetical protein EH28 02351 [Larimichthys crocea]
c5580_g1_i1 3452	gi|617387749|ref|XP_007548490.1|	3452	43.54	888	56.4189	501	97.6048	PREDICTED: uncharacterized protein LOC103135614 [Poecilia formosa] (putative tRNA threonylcarbamoyladenosine biosynthesis protein Ywl)
c5586_g1_i2 1020	gi|617509231|ref|XP_007542513.1|	1020	65.5882	1536	14.5182	223	90.583	PREDICTED: uncharacterized protein LOC103130924 [Poecilia formosa] (ATP-dependent DNA helicase PIF1-like)
c5604_g1_i1 3663	gi|939294145|ref|XP_014266220.1|	3663	99.9181	1542	79.0532	1231	54.7522	PREDICTED: uncharacterized protein LOC106675657 [Maylandia zebra]
c5614_g1_i2 1943	gi|941807903|ref|XP_014328946.1|	1943	31.0345	416	50	210	74.2857	PREDICTED: E3 ubiquitin/ISG15 ligase TRIM25-like [Xiphophorus maculatus] (tripartite motif-containin)
c5616_g1_i1 1157	gi|808870943|gb|KKF20718.1|	1157	44.5981	581	29.6041	172	84.3023	Transposon TX1 hypothetical protein [Larimichthys crocea]
c5639_g1_i1 1544	gi|688557767|ref|XP_009300232.1|	1544	96.3731	1137	43.4477	499	55.511	PREDICTED: uncharacterized protein LOC103911140 isoform X1 [Danio rerio]
c5648_g1_i1 1355	gi|617517394|ref|XP_007543891.1|	1355	63.9852	823	39.6112	331	75.5287	PREDICTED: centromere protein T-like, partial [Poecilia formosa] (glutamic acid-rich)
c5657_g2_i1 1118	gi|542181818|ref|XP_005469028.1|	1118	48.3005	972	18.3128	181	50.2762	PREDICTED: uncharacterized protein LOC102076250 [Oreochromis niloticus]
c5669_g1_i1 2579	gi|939311315|ref|XP_014269797.1|	2579	56.9988	762	64.3045	490	65.3061	PREDICTED: LOW QUALITY PROTEIN: retrotransposon-like protein 1 [Maylandia zebra] (pol polyprotein; RE TF2)
c5678_g1_i1 1567	gi|617502665|ref|XP_007541003.1|	1567	60.4978	316	100	316	94.9367	PREDICTED: olfactory receptor 2AK2-like [Poecilia formosa]
c5697_g1_i1 1002	gi|617456048|ref|XP_007570318.1|	1002	35.6287	364	32.967	120	79.1667	PREDICTED: polymeric immunoglobulin receptor-like [Poecilia formosa]
c5704_g2_i1 1044	gi|658876968|ref|XP_008421497.1|	1044	66.3793	1107	19.0605	235	65.1064	PREDICTED: ras-specific guanine nucleotide-releasing factor 2-like isoform X7 [Poecilia reticulata]
c5782_g1_i1 1188	gi|941822154|ref|XP_014331179.1|	1188	66.1616	328	79.5732	262	87.0229	PREDICTED: LOW QUALITY PROTEIN: P2Y purinoceptor 1-like [Xiphophorus maculatus]
c5786_g1_i1 6301	gi|23194332|gb|AAN15112.1|	6301	58.0384	2023	61.0974	1242	59.7424	gag-pol fusion polyprotein [Takifugu rubripes] (TE)
c5787_g1_i5 3377	gi|928063624|ref|XP_013881370.1|	3377	36.7782	695	52.9496	414	71.7391	PREDICTED: uncharacterized protein LOC106530320, partial [Austrofundulus limnaeus]
c5850_g1_i1 2318	gi|617509231|ref|XP_007542513.1|	2318	90.2071	1536	45.3776	712	80.618	PREDICTED: uncharacterized protein LOC103130924 [Poecilia formosa] (TPA exp: replicase/helicase/endonuclease)
c6204_g1_i1 1038	gi|808877071|gb|KKF25634.1|	1038	81.5029	506	55.5336	282	75.1773	Retrovirus-related Pol polyprotein from transposon 412 [Larimichthys crocea]
c6255_g1_i1 1245	gi|617441386|ref|XP_007565217.1|	1245	99.759	1283	33.0475	425	90.3529	PREDICTED: neurabin-1-like [Poecilia formosa]
c6286_g1_i1 1158	gi|765140348|ref|XP_011481531.1|	1158	42.7461	705	18.8652	167	65.8683	PREDICTED: actin filament-associated protein 1-like 1 [Oryzias latipes]
c6350_g1_i1 1666	gi|617519495|ref|XP_007543956.1|	1666	34.2137	1304	14.8773	194	53.6082	PREDICTED: GRIP and coiled-coil domain-containing protein 2-like [Poecilia formosa]
c6411_g1_i1 2162	gi|928053301|ref|XP_013875868.1|	2162	84.7826	763	80.2097	616	56.3312	PREDICTED: uncharacterized protein LOC106525994 [Austrofundulus limnaeus]
c6527_g1_i1 1114	gi|831494447|ref|XP_012708318.1|	1114	42.0108	1188	11.7003	156	64.7436	PREDICTED: uncharacterized protein LOC105917918 [Fundulus heteroclitus]
c6539_g1_i1 1658	gi|551504241|ref|XP_005803657.1|	1658	34.3788	236	68.2203	190	81.0526	PREDICTED: claudin-7-B-like isoform X1 [Xiphophorus maculatus]
