# Supplementary material for: The Genome of the Trinidadian Guppy, Poecilia reticulata, and Variation in the Guanapo Population
Source: PLoS One. 2016 Dec 29;11(12):e0169087. doi: 10.1371/journal.pone.0169087 (PMC5199103; doi:10.1371/journal.pone.0169087)
Supplement: S13 Table — (XLSX) [file pone.0169087.s017.xlsx]

## Sheet: Sheet1
S13 Table. Protein coding genes with putative functions in pigment pattern development, vision, growth and sex differentiation.
Gene name	Accession	Annotation
A.baerii androgen receptor ar	gi|321272513|gb|HQ110107.1|	A. baerii androgen receptor (ar) mRNA, partial cds
A.baerii doublesex and mab-3-related TF1 dmrt1	gi|321272511|gb|HQ110106.1|	A. baerii doublesex and mab-3 related transcription factor 1 (dmrt1) mRNA, partial cds
Acanthopagrus schlegeli Wnt4protein wnt4	gi|81097468|gb|DQ268648.1|	Acanthopagrus schlegeli Wnt4 protein (wnt4) mRNA, partial cds
Acanthopagrus schlegelii glyceraldehyde3-phosphatedehydrogenase	gi|89147694|gb|DQ399798.1|	Acanthopagrus schlegelii glyceraldehyde 3-phosphate dehydrogenase mRNA, partial cds
Acanthopagrus schlegelii vasaprotein	gi|89147696|gb|DQ399799.1|	Acanthopagrus schlegelii vasa protein mRNA, partial cds
Acipenser schrenckii TFSox9 sox9	gi|51599118|gb|AY581214.1|	Acipenser schrenckii transcription factor Sox9 (sox9) mRNA, partial cds
Acipenser transmontanus DMRT1formST1	gi|23428499|gb|AY057061.1|	Acipenser transmontanus DMRT1 form ST1 mRNA, complete cds
Acipenser transmontanus DMRT1formST2	gi|23428504|gb|AY057062.1|	Acipenser transmontanus DMRT1 form ST2 mRNA, complete cds
AcipenserbaeriiSox9 Sox9	gi|165881949|gb|EU241882.1|	Acipenser baerii Sox9 (Sox9) mRNA, partial cds
Anguilla anguilla follicle- stimulating hormone beta subunit GTHI	gi|24935272|gb|AY148427.1|	Anguilla anguilla follicle-stimulating hormone beta subunit (GTHI) mRNA, partial cds
Aristichthys nobilis cloneA153dual specificity phosphatase1	gi|226358662|gb|FJ502066.1|	Aristichthys nobilis clone A153 dual specificity phosphatase 1 mRNA, partial cds
Aristichthys nobilis cloneA157dual specificity phosphatase1	gi|226358656|gb|FJ502063.1|	Aristichthys nobilis clone A157 dual specificity phosphatase 1 mRNA, partial cds
Carassius auratus Dmrt3	gi|195549519|gb|EU850737.1|	Carassius auratus Dmrt3 gene, partial cds
Carassius auratus FTZ-F1	gi|22023901|gb|AF526537.1|	Carassius auratus FTZ-F1 mRNA, complete cds
Carassius auratus phosphatidy linositol3-kinase	gi|4001814|gb|AF046005.1|	Carassius auratus putative phosphatidylinositol 3-kinase mRNA, partial cds
Carassius auratus Sox3	gi|121544127|gb|EF174418.1|	Carassius auratus Sox3 mRNA, complete cds
Carassius auratus x Cyprinus carpio HMGbox TF Sox9b	gi|58223365|gb|AY874424.1|	Carassius auratus x Cyprinus carpio HMG box transcription factor Sox9b (sox9b) mRNA, complete cds
Carassius auratus x Cyprinus carpio HMGbox TFSox9a	gi|70727924|gb|DQ098685.1|	Carassius auratus x Cyprinus carpio HMG box transcription factor Sox9a mRNA, complete cds
Carassius auratus x Cyprinus carpio x Carassius cuvieri TFSox9a Sox9a	gi|76363933|gb|DQ191773.1|	Carassius auratus x Cyprinus carpio x Carassius cuvieri transcription factor Sox9a (Sox9a) gene, complete cds
Carassius auratus xCyprinus carpio xCarassiuscuvieriHMGboxTFSox9	gi|76446624|gb|DQ201318.1|	Carassius auratus x Cyprinus carpio x Carassius cuvieri HMG box transcription factor Sox9 mRNA, complete cds
Clarias gariepinus tryptophan hydroxylase	gi|300952939|gb|GU290195.1|	Clarias gariepinus tryptophan hydroxylase mRNA, complete cds
Cyprinus carpio Dmrt3	gi|194475167|gb|EU864031.1|	Cyprinus carpio Dmrt3 gene, partial cds
Cyprinus carpio doublesex and mab-3-related TF1	gi|82400487|gb|DQ241767.1|	Cyprinus carpio doublesex and mab-3 related transcription factor 1 mRNA, partial cds
Cyprinus carpio HMG-box TF Sox9b	gi|61808323|gb|AY956415.1|	Cyprinus carpio HMG-box transcription factor Sox9b (sox9b) mRNA, complete cds
Cyprinus carpio SF-1	gi|170522359|gb|EU022463.1|	Cyprinus carpio SF-1 mRNA, complete cds
Cyprinus carpio x Carassius auratus Dmrt3	gi|195549521|gb|EU850738.1|	Tetraploid Cyprinus carpio x Carassius auratus Dmrt3 gene, partial cds
Danio rerio Sox3	gi|84871723|dbj|AB117960.2|	Danio rerio mRNA for Sox3, complete cds
Danio rerio -Ha-ras Harvey rat sarcoma viral oncogen homologb hrasb	gi|66472487|ref|NM_001020629.1|	Danio rerio -Ha-ras Harvey rat sarcoma viral oncogene homolog b (hrasb), mRNA_x0001_BC095393.1 Danio rerio -Ha-ras Harvey rat sarcoma viral oncogene homolog,like, mRNA (cDNA clone MGC:110734 IMAGE:7177726), complete cds
Danio rerio activinAreceptor typeIlike acvr1l	gi|18858266|ref|NM_131345.1|	Danio rerio activin A receptor, type I like (acvr1l), mRNA_x0001_AF038425.1 Danio rerio activin receptor-like kinase 8 mRNA, complete cds
Danio rerio aldehydedehydrogenase1 family memberA2 aldh1a2	gi|18858264|ref|NM_131850.1|	Danio rerio aldehyde dehydrogenase 1 family, member A2 (aldh1a2), mRNA_x0001_AF339837.1 Danio rerio retinaldehyde dehydrogenase type 2 (RALDH2) mRNA,complete cds
Danio rerio anti-Mullerian hormone amh	gi|56090639|ref|NM_001007779.1|	Danio rerio anti-Mullerian hormone (amh), mRNA_x0001_AY721604.1 Danio rerio anti-mullerian hormone mRNA, complete cds
Danio rerio bactin1 bactin1	gi|18858334|ref|NM_131031.1|	Danio rerio actin, beta 1 (actb1), mRNA_x0001_AF057040.1 Danio rerio beta-actin mRNA, complete cds
Danio rerio basonuclin2 bnc2	gi|170295820|ref|NM_001122755.1|	Danio rerio si:dkey-114f6.1, mRNA (cDNA clone MGC:175252 IMAGE:7063814), complete cds
Danio rerio BMP and activinmembrane-bound inhibitor Xenopus laevis homologa bambia	gi|18858338|ref|NM_131784.1|	Danio rerio nma mRNA, complete cds
Danio rerio bone morphogenetic protein 4 bmp4	gi|54262123|ref|NM_131342.2|	Danio rerio bone morphogenetic protein 4 (bmp4), mRNA_x0001_BC078423.1 Danio rerio bone morphogenetic protein 4, mRNA (cDNA clone MGC:100779 IMAGE:7160987), complete cds
Danio rerio bonemorphoticprotein2b bmp2b	gi|35215299|ref|NM_131360.1|	Danio rerio bone morphogenetic protein 2 (bmp2) mRNA, complete cds
Danio rerio carboxypeptidaseA5 cpa5	gi|40548301|ref|NM_199271.1|	Danio rerio carboxypeptidase A5 (cpa5), mRNA_x0001_BC056300.1 Danio rerio carboxypeptidase A5, mRNA (cDNA clone MGC:66011 IMAGE:6793267),complete cds
Danio rerio cathepsinL 1b ctsl1b	gi|18858808|ref|NM_131198.1|	Danio rerio cathepsin Lb (ctslb), mRNA_x0001_Y08321.1 D.rerio mRNA for cathepsin L
Danio rerio ceruloplasmin cp	gi|40538763|ref|NM_131802.1|	Danio rerio ceruloplasmin (cp), mRNA_x0001_BC048037.1 Danio rerio ceruloplasmin, mRNA (cDNA clone MGC:55445 IMAGE:2639683),complete cds
Danio rerio chemokine C-X-Cmotif receptor4b cxcr4b	gi|18858506|ref|NM_131834.1|	Danio rerio chemokine (C-X-C motif), receptor 4b (cxcr4b), mRNA_x0001_AF201451.1 Danio rerio chemokine receptor CXCR4 (CXCR4) mRNA, complete cds
Danio rerio chordin chd	gi|18858412|ref|NM_130973.1|	Danio rerio chordin mRNA, complete cds
Danio rerio corin	XM_017353763.1	PREDICTED: Danio rerio si:ch1073-76a20.1 (si:ch1073-76a20.1), transcript variant X3, mRNA
Danio rerio cytochromeP450 cyp11b2	gi|122114611|ref|NM_001080204.1|	Danio rerio cytochrome P450, family 11, subfamily C, polypeptide 1 (cyp11c1), mRNA_x0001_DQ650710.1 Danio rerio cytochrome P45011B mRNA, complete cds
Danio rerio cytochromeP450 subfamilyXIA polypeptide1 cyp11a1 nuclear encoding mitochondrial protein	gi|42476255|ref|NM_152953.2|	Danio rerio cytochrome P450, family 11, subfamily A, polypeptide 1 (cyp11a1), mRNA_x0001_BC054701.1 Danio rerio cytochrome P450, subfamily XIA, polypeptide 1, mRNA(cDNA clone MGC:66431 IMAGE:2599603), complete cds
Danio rerio dead end dnd	gi|47086450|ref|NM_212795.1|	Danio rerio DND microRNA-mediated repression inhibitor 1 (dnd1), mRNA_x0001_AY225448.1 Danio rerio dead end (dnd) mRNA, complete cds
Danio rerio DeadEnd	BC095578.1	Danio rerio dead end, mRNA (cDNA clone MGC:111864 IMAGE:7412116), complete cds
Danio rerio developingbrainhomeobox1a dbx1a	gi|18858528|ref|NM_131158.1|	Danio rerio developing brain homeobox 1a (dbx1a), mRNA_x0001_AF030284.1 Danio rerio homeobox protein (hlx1) mRNA, complete cds
Danio rerio DiGeorge syndrome critical region 8 clone IMAGE:8099701	gi|115313586|gb|BC124419.1|	Danio rerio DiGeorge syndrome critical region gene 8, mRNA (cDNA clone IMAGE:8099701), partial cds
Danio rerio DiGeorge syndrome critical region8 dgcr8	gi|170172600|ref|NM_001122749.1|	Danio rerio DGCR8 microprocessor complex subunit (dgcr8), mRNA
Danio rerio Dmrt1	gi|33315847|gb|AF439562.1|	Danio rerio Dmrt1 mRNA, complete cds
Danio rerio Dmrt1 doublesex and mab -3 related TF DMRT1	gi|261278083|dbj|AB127117.1|	Danio rerio doublesex and mab-3 related transcription factor 1 (dmrt1), transcript variant 1, mRNA
Danio rerio DMRT3	gi|50910921|gb|AY621084.1|	Danio rerio DMRT3 gene, partial cds
Danio rerio doublesex and mab -3-related TF1 dmrt1 alternatively spliced	gi|51475130|gb|AY588966.1|	Danio rerio doublesex and mab-3-related transcription factor 1 (dmrt1) mRNA, complete cds, alternatively spliced
Danio rerio doublesex and mab-3-related TF1	gi|95132408|gb|BC116610.1|	Danio rerio doublesex and mab-3 related transcription factor 1, mRNA (cDNA clone MGC:136676 IMAGE:7045379), complete cds
Danio rerio doublesex and mab-3-related TF1 dmrt1	gi|51861215|gb|AY566608.1|	Danio rerio doublesex and mab-3 related transcription factor 1 (dmrt1) mRNA, complete cds
Danio rerio doublesex and mab-3-related TF1 dmrt1 transcript variant1	gi|51556242|ref|NM_205628.1|	Danio rerio doublesex- and mab-3-related transcription factor 1 a1 mRNA, complete cds
Danio rerio doublesex and mab-3-related TF1 dmrt1 transcript variant2	gi|51556250|ref|NM_205761.1|	Danio rerio doublesex- and mab-3-related transcription factor 1 c1 mRNA, complete cds
Danio rerio doublesex and mab-3-related TF2a clone MGC:193637IMAGE:9037689	gi|190337837|gb|BC162138.1|	Danio rerio doublesex and mab-3 related transcription factor 2a, mRNA (cDNA clone MGC:193637 IMAGE:9037689), complete cds
Danio rerio doublesex and mab-3-related TF2a clone MGC:193645IMAGE:9037781	gi|190339273|gb|BC162142.1|	Danio rerio doublesex and mab-3 related transcription factor 2a, mRNA (cDNA clone MGC:193645 IMAGE:9037781), complete cds
Danio rerio doublesex and mab-3-related TF2a dmrt2a	gi|18859474|ref|NM_130952.1|	Danio rerio doublesex and mab-3 related transcription factor 2a (dmrt2a), mRNA_x0001_AF080622.1 Danio rerio terra mRNA, complete cds
Danio rerio doublesex and mab-3-related TF2b clone MGC:195252IMAGE:9038849	gi|190340039|gb|BC163825.1|	Danio rerio doublesex and mab-3 related transcription factor 2b, mRNA (cDNA clone MGC:195252 IMAGE:9038849), complete cds
Danio rerio doublesex and mab-3-related TF2b clone MGC:195257IMAGE:9038853	gi|190337725|gb|BC163830.1|	Danio rerio doublesex and mab-3 related transcription factor 2b, mRNA (cDNA clone MGC:195257 IMAGE:9038853), complete cds
Danio rerio doublesex and mab-3-related TF2b dmrt2b	gi|121583745|ref|NM_001079976.1|	Danio rerio doublesex and mab-3 related transcription factor 2b (dmrt2b), mRNA_x0001_DQ307066.1 Danio rerio doublesex- and mab-3-related transcription factor 2b (dmrt2b) mRNA, complete cds
Danio rerio doublesex and mab-3-related TF3 dmrt3	gi|53680475|gb|AY621083.1|	Danio rerio doublesex and mab-3 related transcription factor 3 (dmrt3) mRNA, complete cds
Danio rerio doublesex and mab-3-related TF3a dmrt3a	gi|229577301|ref|NM_001005779.2|	Danio rerio doublesex and mab-3 related transcription factor 3a (dmrt3a), mRNA
Danio rerio doublesex and mab-3-related TFlikefamilyA2 dmrta2	gi|302318883|ref|NM_001007064.2|	Danio rerio DMRT-like family A2 (dmrta2), mRNA
Danio rerio doublesex-and mab-3-related TF1a2	gi|37724048|gb|AY157561.1|	Danio rerio doublesex- and mab-3-related transcription factor 1 a2 mRNA, complete cds
Danio rerio doublesex-and mab-3-related TF1a3	gi|37724052|gb|AY157563.1|	Danio rerio doublesex- and mab-3-related transcription factor 1 a3 mRNA, complete cds
Danio rerio doublesex-and mab-3-related TF1a4	gi|37724054|gb|AY157564.1|	Danio rerio doublesex- and mab-3-related transcription factor 1 a4 mRNA, complete cds
Danio rerio doublesex-and mab-3-related TF1b1	gi|37724056|gb|AY157565.1|	Danio rerio doublesex- and mab-3-related transcription factor 1 b1 mRNA, complete cds
Danio rerio doublesex-and mab-3-related TF1b2	gi|37724058|gb|AY157566.1|	Danio rerio doublesex- and mab-3-related transcription factor 1 b2 mRNA, complete cds
Danio rerio doublesex-and mab-3-related TF1c2	gi|37724062|gb|AY157568.1|	Danio rerio doublesex- and mab-3-related transcription factor 1 c2 mRNA, complete cds
Danio rerio doublesex-and mab-3-related TF1c3	gi|37724064|gb|AY157569.1|	Danio rerio doublesex- and mab-3-related transcription factor 1 c3 mRNA, complete cds
Danio rerio doublesex-and mab-3-related TF1c4	gi|37724066|gb|AY157570.1|	Danio rerio doublesex- and mab-3-related transcription factor 1 c4 mRNA, complete cds
Danio rerio doublesex-and mab-3-related TF1c5	gi|37724068|gb|AY157571.1|	Danio rerio doublesex- and mab-3-related transcription factor 1 c5 mRNA, complete cds
Danio rerio doublesex-and mab-3-related TF5 dmrt5	gi|52631667|gb|AY618549.1|	Danio rerio doublesex- and mab-3-related transcription factor 5 (dmrt5) mRNA, complete cds
Danio rerio doublesex-like protein Dmrt3a	gi|10567727|gb|AF272964.1|	Danio rerio doublesex and mab-3 related transcription factor 3a (dmrt3a), mRNA
Danio rerio doublesex-like protein Dmrt4a	gi|10567723|gb|AF272962.1|	Danio rerio DMRT-like family A2 (dmrta2), mRNA
Danio rerio doublesex-like protein Dmrt4b	gi|10567725|gb|AF272963.1|	Danio rerio doublesex-like protein Dmrt4b gene, partial cds
Danio rerio dre:393388tra2a MGC64175	NM_200416.1	Danio rerio transformer 2 alpha homolog (Drosophila) (tra2a), mRNA_x0001_BC054632.1 Danio rerio transformer-2 alpha, mRNA (cDNA clone MGC:64175 IMAGE:6797461),complete cds
Danio rerio dre:394172tra2b MGC56612	NM_201197.1	Danio rerio transformer 2 beta homolog (Drosophila) (tra2b), mRNA_x0001_BC049051.1 Danio rerio splicing factor, arginine/serine-rich, 10, mRNA (cDNA clone MGC:56612 IMAGE:5915514), complete cds
Danio rerio dre:558224ecm2 si:dkey-42i9.2;extracellular matrix protein 2	XM_681415.5	PREDICTED: Danio rerio extracellular matrix protein 2, female organ and adipocyte specific (ecm2), mRNA
Danio rerio dre:796595 agouti related	NM_001271291.1	Danio rerio agouti related neuropeptide 2 (agrp2)
Danio rerio EGF-containing fibulin-like extra cellular matrix protein 1-like LOC100332567 partial	gi|292619869|ref|	PREDICTED: Danio rerio EGF containing fibulin-like extracellular matrix protein 1 (efemp1), transcript variant X3, mRNA
Danio rerio EGF-containing fibulin-like extra cellular matrix protein 2 efemp2	gi|56693244|ref|NM_001008587.1|	Danio rerio EGF containing fibulin-like extracellular matrix protein 2a (efemp2a), mRNA_x0001_BC086840.1 Danio rerio EGF-containing fibulin-like extracellular matrix protein 2, mRNA (cDNA clone MGC:103659 IMAGE:7256342), complete cds
Danio rerio eph recepto A4b epha4b	gi|24119221|ref|NM_153658.1|	Danio rerio eph receptor A4b (epha4b), mRNA_x0001_AF369381.1 Danio rerio Eph receptor EphA4b (RTK2) mRNA, complete cds
Danio rerio epidermal growthfactor receptora erythroblastic leukemia viral v-erb-b oncogen homolog avian egfra	gi|35903182|ref|NM_194424.1|	Danio rerio epidermal growth factor receptor a (erythroblastic leukemia viral (v-erb-b) oncogene homolog, avian) (egfra),mRNA_x0001_AY154658.1 Danio rerio epidermal growth factor receptor mRNA, complete cds
Danio rerio even-skipped-like1 eve1	gi|18858644|ref|NM_131114.1|	Danio rerio even-skipped-like1 (eve1), mRNA_x0001_X71845.1 B.rerio eve 1 mRNA
Danio rerio Facd1 brca2	EF088196.1	Danio rerio breast and ovarian cancer susceptibility protein 2 (brca2) mRNA, complete cds
Danio rerio factor in the germline alpha figla	gi|65301441|ref|NM_198919.2|	Danio rerio folliculogenesis specific bHLH transcription factor (figla), mRNA_x0001_BC092676.1 Danio rerio factor in the germline alpha, mRNA (cDNA clone MGC:109752 IMAGE:7291655), complete cds
Danio rerio Fancl	NM_212982.1	Danio rerio Fanconi anemia, complementation group L (fancl), mRNA_x0001_BC066750.1 Danio rerio Fanconi anemia, complementation group L, mRNA (cDNA clone MGC:76938 IMAGE:6524898), complete cds
Danio rerio fem-1 homologc C.elegans fem1c	gi|41282174|ref|NM_198145.2|	Danio rerio fem-1 homolog c (C. elegans) (fem1c), mRNA_x0001_BC056774.1 Danio rerio fem-1 homolog c (C.elegans), mRNA (cDNA clone MGC:63509 IMAGE:2642813), complete cds
Danio rerio fem-1homologa C.elegans fem1a	gi|41054154|ref|NM_199837.1|	Danio rerio fem-1 homolog a (C. elegans) (fem1a), mRNA_x0001_BC060522.1 Danio rerio fem-1 homolog a (C. elegans), mRNA (cDNA clone MGC:63483 IMAGE:2601702), complete cds
Danio rerio fem-1homologb C.elegans fem1b	gi|292627944|ref|	PREDICTED: Danio rerio fem-1 homolog b (C. elegans) (fem1b), mRNA
Danio rerio Fem1c	gi|31322631|gb|AY249190.1|	Danio rerio Fem1c mRNA, complete cds
Danio rerio fibroblast growth factor 16 clone MGC:194912IMAGE:9038914	gi|190339873|gb|BC163741.1|	Danio rerio fibroblast growth factor 16, mRNA (cDNA clone MGC:194912 IMAGE:9038914), complete cds_x0001_BC163752.1 Danio rerio fibroblast growth factor 16, mRNA (cDNA clone MGC:194923 IMAGE:9038916), complete cds
Danio rerio fibroblast growth factor 16 clone MGC:194923IMAGE:9038916	gi|190339877|gb|BC163752.1|	Danio rerio fibroblast growth factor 16, mRNA (cDNA clone MGC:194912 IMAGE:9038914), complete cds_x0001_BC163752.1 Danio rerio fibroblast growth factor 16, mRNA (cDNA clone MGC:194923 IMAGE:9038916), complete cds
Danio rerio fibroblast growth factor 16 fgf16	gi|94536732|ref|NM_001040407.1|	Danio rerio fibroblast growth factor 16 (fgf16), mRNA_x0001_AB201764.1 Danio rerio fgf16 mRNA for fibroblast growh factor 16, complete cds
Danio rerio fibroblast growth factor 20a clone MGC:194267IMAGE:9037179	gi|190337098|gb|BC162861.1|	Danio rerio fibroblast growth factor 20a (fgf20a), mRNA
Danio rerio fibroblast growth factor 20a clone MGC:194292IMAGE:9037153	gi|190337117|gb|BC162886.1|	Danio rerio fibroblast growth factor 20a (fgf20a), mRNA
Danio rerio fibroblast growth factor 20a fgf20a	gi|80751118|ref|NM_001037103.1|	Danio rerio fibroblast growth factor 20a (fgf20a), mRNA
Danio rerio fibroblast growth factor 20b fgf20b	gi|85677487|ref|NM_001039172.1|	Danio rerio fibroblast growth factor 20b (fgf20b), mRNA_x0001_DQ241822.1 Danio rerio fibroblast growth factor 20b mRNA, complete cds
Danio rerio fibroblast growth factor 20b-like LOC100333486	gi|292620819|ref|	Danio rerio fibroblast growth factor 20b (fgf20b), mRNA_x0001_DQ241822.1 Danio rerio fibroblast growth factor 20b mRNA, complete cds
Danio rerio fibroblast growth factor 24 fgf24	gi|113931652|ref|NM_182871.3|	Danio rerio fibroblast growth factor 24 (fgf24), mRNA_x0001_BC121748.1 Danio rerio fibroblast growth factor 24, mRNA (cDNA clone MGC:152742 IMAGE:8149767), complete cds
Danio rerio fibulin-4 fbln4	gi|40557118|gb|AY427783.1|	Danio rerio fibulin-4 (fbln4) mRNA, complete cds
Danio rerio fibulin4 fbln4	gi|237858812|ref|NM_001160358.1|	Danio rerio EGF containing fibulin-like extracellular matrix protein 2b (efemp2b), mRNA_x0001_BC159249.1 Danio rerio similar to fibulin-4, mRNA (cDNA clone MGC:175181 IMAGE:7068606), complete cds
Danio rerio forkheadboxB1.2 foxb1.2	gi|18858698|ref|NM_131285.1|	Danio rerio forkhead box B1a (foxb1a), mRNA_x0001_AF052246.1 Danio rerio fork head domain protein FKD3 (fkd3) mRNA, complete cds
Danio rerio forkheadboxG1a foxg1a	gi|18858706|ref|NM_131067.1|	Danio rerio forkhead box G1a (foxg1a), mRNA_x0001_AF067204.1 Danio rerio transcription factor BF-1 mRNA, complete cds
Danio rerio forkheadboxL2 foxl2	gi|113675293|ref|NM_001045252.1|	Danio rerio forkhead box L2, mRNA (cDNA clone MGC:136549 IMAGE:7073361), complete cds
Danio rerio foxl2-like zgc:194189 zgc:194189	gi|192447388|ref|NM_001128810.1|	Danio rerio zgc:194189 (zgc:194189), mRNA_x0001_BC162838.1 Danio rerio similar to Foxl2 diverged paralog, mRNA (cDNA clone MGC:194189 IMAGE:9037423), complete cds
Danio rerio Foxl2ortholog-like LOC100149117	gi|189529375|ref|	Danio rerio forkhead box protein L2-like (LOC100149117), mRNA_x0001_KR232690.1 Danio rerio forkhead box L2-like protein (foxl2-like) mRNA, complete cds
Danio rerio gamma-glutamyl cyclotransferase ggct	gi|47085666|ref|NM_213005.1|	Danio rerio gamma-glutamylcyclotransferase b (ggctb), mRNA_x0001_BC045940.1 Danio rerio gamma-glutamyl cyclotransferase, mRNA (cDNA clone MGC:56140 IMAGE:5411968), complete cds
Danio rerio GATA-binding protein 2a gata2a	gi|40538757|ref|NM_131233.1|	Danio rerio GATA binding protein 2a (gata2a), mRNA_x0001_BC053131.1 Danio rerio GATA-binding protein 2a, mRNA (cDNA clone MGC:63885 IMAGE:6789690), complete cds
Danio rerio GATAbinding protein 1a gata1a	gi|18858730|ref|NM_131234.1|	Danio rerio GATA binding protein 1a (gata1a), mRNA_x0001_U18311.1 Danio rerio zg1 mRNA, complete cds
Danio rerio glial fibrillary acidic protein gfap	gi|66393074|ref|NM_131373.2|	Danio rerio glial fibrillary acidic protein (gfap), mRNA_x0001_BC091942.1 Danio rerio glial fibrillary acidic protein, mRNA (cDNA clone MGC:110485 IMAGE:7147201), complete cds
Danio rerio growth factor independent1.2 gfi1.2	gi|41152216|ref|NM_201338.1|	Danio rerio growth factor independent 1.2, mRNA (cDNA clone MGC:194663 IMAGE:9038961), complete cds
Danio rerio hairy-related5 her5	gi|18858796|ref|NM_131077.1|	Danio rerio hairy-related 5 (her5), mRNA_x0001_X95301.1 D.rerio mRNA for HER-5 protein
Danio rerio hemicentin1 hmcn1	gi|298286475|ref|NM_001190304.1|	Danio rerio hemicentin1 protein mRNA, complete cds
Danio rerio homeoboxB2a hoxb2a	gi|42734408|ref|NM_131116.2|	Danio rerio homeobox B2a (hoxb2a), mRNA_x0001_BC065967.1 Danio rerio homeo box B2a, mRNA (cDNA clone MGC:76824 IMAGE:6968754),complete cds
Danio rerio homeoboxB6a hoxb6a	gi|18858838|ref|NM_131119.1|	Danio rerio homeobox B6a (hoxb6a), mRNA
Danio rerio hyaluronan synthase2 has2	gi|73663894|ref|NM_153650.2|	Danio rerio hyaluronan synthase 2 (has2), mRNA_x0001_BC100130.1 Danio rerio hyaluronan synthase 2, mRNA (cDNA clone MGC:114015 IMAGE:7437521), complete cds
Danio rerio hydroxy-delta-5-steroid dehydrogenase 3beta-and steroid delta-isomerase1 hsd3b1	gi|47086446|ref|NM_212797.1|	Danio rerio hydroxy-delta-5-steroid dehydrogenase, 3 beta- and steroid delta-isomerase 2 (hsd3b2), mRNA_x0001_AY279108.1 Danio rerio 3-beta-hydroxysteroid dehydrogenase mRNA, complete cds
Danio rerio inhibitor of DNA binding2 dominant negative helix-loop-helixprotein a id2a	gi|41152039|ref|NM_201291.1|	Danio rerio inhibitor of DNA binding 2, dominant negative helix-loop-helix protein, a (id2a), mRNA_x0001_BC056303.1 Danio rerio inhibitor of DNA binding 2, dominant negative helix-loop-helix protein, a, mRNA (cDNA clone MGC:66023 IMAGE:6793966),complete cds
Danio rerio insulin-like growth factor1 igf1	gi|90017461|ref|NM_131825.2|	Danio rerio insulin-like growth factor 1 (igf1), mRNA_x0001_BC114262.1 Danio rerio insulin-like growth factor 1, mRNA (cDNA clone MGC:136745 IMAGE:7998031), complete cds
Danio rerio Kruppel-like factor2a klf2a	gi|134085344|ref|NM_131856.2|	Danio rerio Kruppel-like factor 2a, mRNA (cDNA clone MGC:77570 IMAGE:6997059), complete cds
Danio rerio laminin gamma1 lamc1	gi|27545304|ref|NM_173277.1|	Danio rerio laminin, gamma 1 (lamc1), mRNA_x0001_AF468048.1 Danio rerio laminin gamma 1 (lamc1) mRNA, complete cds
Danio rerio leucinerich repeat containing50 lrrc50	gi|38488754|ref|NM_198826.1|	Danio rerio leucine rich repeat containing 50, mRNA (cDNA clone MGC:56169 IMAGE:5413055), complete cds
Danio rerio lysozyme lyz	gi|23308612|ref|NM_139180.1|	Danio rerio lysozyme (lyz), mRNA_x0001_AF402599.1 Danio rerio lysozyme C mRNA, complete cds
Danio rerio MADhomolog5 Drosophila smad5	gi|40254704|ref|NM_131368.2|	Danio rerio MAD homolog 5 (Drosophila), mRNA (cDNA clone MGC:55211 IMAGE:3819626), complete cds
Danio rerio Makorin 2 (mkrn2) mRNA, complete cds	AF277172.1	Danio rerio Makorin RING zinc-finger protein 2 (mkrn2)
Danio rerio matrix metalloproteinase 13a_mmp13	gi|41393162|ref|NM_201503.1|	Danio rerio matrix metalloproteinase 13, mRNA (cDNA clone MGC:56521 IMAGE:5913886), complete cds
Danio rerio mediator complex subunit29 clone MGC:109789IMAGE:7280922	gi|63102325|gb|BC094992.1|	Danio rerio mediator complex subunit 29, mRNA (cDNA clone MGC:109789 IMAGE:7280922), complete cds
Danio rerio mediator complex subunit29 clone MGC:192128IMAGE:100060437	gi|182889331|gb|BC164953.1|	Danio rerio mediator complex subunit 29, mRNA (cDNA clone MGC:192128 IMAGE:100060437), complete cds
Danio rerio mediator complex subunit29 med29	gi|27545292|ref|NM_173271.1|	Danio rerio mediator complex subunit 29 (med29), mRNA_x0001_AF506210.1 Danio rerio DKFZp434H247-like protein mRNA, complete cds
Danio rerio mitogen-activated protein kinase3 mapk3	gi|41393176|ref|NM_201507.1|	Danio rerio mitogen-activated protein kinase 3 (mapk3), mRNA_x0001_BC045505.1 Danio rerio mitogen-activated protein kinase 3, mRNA (cDNA clone MGC:55955 IMAGE:3819346), complete cds
Danio rerio muscle segment homeoboxB msxb	gi|65301421|ref|NM_131260.1|	Danio rerio muscle segment homeobox 1b (msx1b), mRNA_x0001_BC095311.1 Danio rerio muscle segment homeobox B, mRNA (cDNA clone MGC:110559 IMAGE:7158359), complete cds
Danio rerio myeloid ecotropic virali ntegration site3 meis3	gi|18859012|ref|NM_131778.1|	Danio rerio myeloid ecotropic viral integration site 3 (meis3), mRNA_x0001_AF222995.1 Danio rerio homeobox transcription factor Meis3 (meis3) mRNA,complete cds
Danio rerio neuregulin1 nrg1	gi|113676189|ref|NM_001044911.1|	Danio rerio neuregulin mRNA, complete cds
Danio rerio neuroblastoma RAS viral v-ras oncogen homolog nras	gi|18859132|ref|NM_131145.1|	Danio rerio p21 N-ras oncogene (n-ras) mRNA, complete cds
Danio rerio nuclear receptor FF1aE	gi|15145790|gb|AY034061.1|	Danio rerio nuclear receptor FF1aE mRNA, complete cds
Danio rerio nuclear receptor subfamily 5 groupA member1a nr5a1a	gi|24119282|ref|NM_131794.1|	Danio rerio nuclear receptor subfamily 5, group A, member 1a (nr5a1a), mRNA_x0001_AF198086.1 Danio rerio ff1b mRNA, complete cds
Danio rerio nuclear receptor subfamily 5 groupA member1a nr5a1a partial	gi|292617296|ref|	Danio rerio nuclear receptor subfamily 5, group A, member 1a (nr5a1a), mRNA_x0001_AF198086.1 Danio rerio ff1b mRNA, complete cds
Danio rerio nuclear receptor subfamily 5 groupA member1a-like LOC100330470 partial	gi|292617278|ref|	Danio rerio nuclear receptor subfamily 5, group A, member 1a (nr5a1a), mRNA_x0001_AF198086.1 Danio rerio ff1b mRNA, complete cds
Danio rerio nuclear receptor subfamily 5 groupA member1b clone MGC:193828IMAGE:9037678	gi|190339355|gb|BC162252.1|	Danio rerio nuclear receptor subfamily 5, group A, member 1b, mRNA (cDNA clone MGC:193828 IMAGE:9037678), complete cds
Danio rerio nuclear receptor subfamily 5 groupA member1b clone MGC:193844IMAGE:9037535	gi|190336812|gb|BC162260.1|	Danio rerio nuclear receptor subfamily 5, group A, member 1b, mRNA (cDNA clone MGC:193844 IMAGE:9037535), complete cds
Danio rerio nuclear receptor subfamily 5 groupA member1b nr5a1b	gi|47086368|ref|NM_212834.1|	Danio rerio nuclear receptor subfamily 5, group A, member 1b (nr5a1b), mRNA_x0001_AY212920.1 Danio rerio Ff1d (ff1d) mRNA, complete cds
Danio rerio nuclear receptor subfamily 5 groupA member2 clone MGC:195042IMAGE:9038604	gi|190340122|gb|BC163522.1|	Danio rerio nuclear receptor subfamily 5, group A, member 2, mRNA (cDNA clone MGC:195042 IMAGE:9038604), complete cds
Danio rerio nuclear receptor subfamily 5 groupA member2 nr5a2	gi|24158438|ref|NM_131463.1|	Danio rerio FTZ-F1 homolog (zFF1) nuclear receptor subfamily 5 groupA member2 mRNA, complete cds
Danio rerio nuclear receptor subfamily 5 groupA member5 nr5a5 transcript variant1	gi|47550852|ref|NM_214779.1|	Danio rerio Ff1c (ff1c) mRNA, complete cds
Danio rerio nuclear receptor subfamily 5 groupA member5 nr5a5 transcript variant2	gi|116267936|ref|NM_001077272.1|	Danio rerio nuclear receptor subfamily 5, group A, member 5, mRNA (cDNA clone MGC:153866 IMAGE:7996632), complete cds
Danio rerio paired-likehomeobox2b phox2b	gi|62414115|ref|NM_001014818.1|	Danio rerio paired-like homeobox 2bb (phox2bb), mRNA_x0001_AY846871.1 Danio rerio paired-like homeobox 2b (phox2b) mRNA, complete cds
Danio rerio pairedbox 2a pax2a	gi|45433522|ref|NM_131184.2|	Danio rerio paired box 2a (pax2a), mRNA_x0001_BC066690.1 Danio rerio paired box gene 2a, mRNA (cDNA clone MGC:76865 IMAGE:6524547),complete cds
Danio rerio pairedbox6b pax6b	gi|18859210|ref|NM_131641.1|	Danio rerio paired box 6b (pax6b), mRNA_x0001_AF061252.1 Danio rerio Pax-family transcription factor 6.2 (pax6.2) mRNA,complete cds
Danio rerio pescadillo pes	gi|40254716|ref|NM_131030.2|	Danio rerio pescadillo, mRNA (cDNA clone MGC:56654 IMAGE:5916249), complete cds
Danio rerio phospholipaseC beta3 phosphatidyl inositol-specific plcb3	gi|218563718|ref|NM_001122773.1|	Danio rerio phospholipase C, beta 3 (phosphatidylinositol-specific) (plcb3), mRNA_x0001_EF204528.1 Danio rerio phospholipase C beta 3 (plcb3) mRNA, complete cds
Danio rerio piwi-like1 Drosophila piwil1	gi|34330157|ref|NM_183338.1|	Danio rerio piwi-like RNA-mediated gene silencing 1 (piwil1), mRNA_x0001_AF336369.1 Danio rerio piwi protein mRNA, complete cds
Danio rerio piwi-like2	gi|124286792|ref|NM_001080199.2|	Danio rerio piwil2 protein mRNA, complete cds
Danio rerio polycystic kidney disease2_pkd2	gi|50539685|ref|NM_001002310.1|	Danio rerio polycystic kidney disease 2 (pkd2), mRNA_x0001_AY618926.1 Danio rerio PKD2 mRNA, complete cds
Danio rerio prostaglandin-endoperoxide synthase2a ptgs2a	gi|24119250|ref|NM_153657.1|	Danio rerio prostaglandin-endoperoxide synthase 2a (ptgs2a), mRNA_x0001_AY028585.1 Danio rerio prostaglandin G/H synthase 2 (ptgs2) mRNA, complete cds
Danio rerio proteindisulfide isomerase associated4 pdia4	gi|41054258|ref|NM_199779.1|	Danio rerio protein disulfide isomerase associated 4, mRNA (cDNA clone MGC:56014 IMAGE:3819834), complete cds
Danio rerio R-spondin homolog Xenopus laevis clone MGC:173850IMAGE:5604720	gi|158253755|gb|BC154194.1|	Danio rerio R-spondin homolog (Xenopus laevis), mRNA (cDNA clone MGC:173850 IMAGE:5604720), complete cds
Danio rerio R-spondin homolog Xenopus laevis rspo1	gi|50539763|ref|NM_001002352.1|	Danio rerio R-spondin 1 (rspo1), mRNA_x0001_BC075907.1 Danio rerio R-spondin homolog (Xenopus laevis), mRNA (cDNA clone MGC:92153 IMAGE:7049832), complete cds
Danio rerio retinol binding protein 4 plasma rbp4	gi|18859308|ref|NM_130920.1|	Danio rerio mRNA for retinol binding protein 4 (rbp4 gene)
Danio rerio secreted frizzled- related protein 1 frp1	gi|37542403|gb|AY050560.1|	Danio rerio secreted frizzled-related protein 1 (frp1) mRNA, complete cds
Danio rerio selenophosphate synthetase2 sps2	gi|157276600|ref|NM_001004295.2|	Danio rerio selenophosphate synthetase 2 (sps2), mRNA
Danio rerio Siah (siaz) 2 Drosophila-like siah2l	gi|55926059|ref|NM_200427.1|	Danio rerio seven in absentia homolog Siah (siaz) mRNA, complete cds
Danio rerio siaz-interacting nuclear protein sinup	gi|37497119|ref|NM_197937.1|	Danio rerio siaz-interacting nuclear protein (sinup), mRNA_x0001_AF409097.1 Danio rerio Siaz-interacting nuclear protein (sinup) mRNA, complete cds
Danio rerio single-minded homolog1a Drosophila sim1a	gi|31342314|ref|NM_178222.2|	Danio rerio single-minded 1 (sim1) mRNA, complete cds
Danio rerio sizzled szl	gi|31880062|ref|NM_181663.1|	Danio rerio sizzled (szl), mRNA_x0001_AB093587.1 Danio rerio szl mRNA for sizzled, complete cds
Danio rerio sonic hedgehog a shha	gi|18859356|ref|NM_131063.1|	Danio rerio sonic hedgehog a shha mRNA, complete cds
Danio rerio Sox3	gi|32331000|gb|AY316135.1|	Danio rerio Sox3 mRNA, complete cds
Danio rerio sox3 3'UTR	gi|222824874|emb|AM422097.3|	Danio rerio sox3 mRNA, 3'UTR
Danio rerio Sp5TF-like sp5l	gi|40254653|ref|NM_194371.2|	Danio rerio Sp5 transcription factor-like (sp5l), mRNA_x0001_AY338748.1 Danio rerio Spr2 (spr2) mRNA, complete cds
Danio rerio spondin1b spon1b	gi|18859414|ref|NM_131517.1|	Danio rerio spondin 1b (spon1b), mRNA_x0001_AB006087.1 Danio rerio mRNA for F-spondin2, complete cds
Danio rerio SRY-box containing 19b sox19b	gi|110626160|ref|NM_131702.1|	Danio rerio SRY (sex determining region Y)-box 19b (sox19b), mRNA_x0001_AB242332.1 Danio rerio sox19b mRNA for transcription factor SOX19B, complete cds
Danio rerio SRY-box containing 3 clone MGC:174245IMAGE:7048256	gi|160773676|gb|BC155138.1|	Danio rerio SRY-box containing gene 3, mRNA (cDNA clone MGC:174245 IMAGE:7048256), complete cds
Danio rerio SRY-box containing 3 sox3	gi|85060503|ref|NM_001001811.2|	Danio rerio SRY (sex determining region Y)-box 3 (sox3), mRNA_x0001_BC092845.1 Danio rerio SRY-box containing gene 3, mRNA (cDNA clone MGC:110279 IMAGE:7400183), complete cds
Danio rerio SRY-box containing 9a	gi|62205310|gb|BC093134.1|	Danio rerio SRY-box containing gene 9a, mRNA (cDNA clone MGC:111921 IMAGE:7430790), complete cds
Danio rerio SRY-box containing 9a sox9a	gi|18859408|ref|NM_131643.1|	Danio rerio SRY (sex determining region Y)-box 9a (sox9a), mRNA_x0001_AF277096.1 Danio rerio HMG box transcription factor Sox9a (sox9a) mRNA,complete cds
Danio rerio SRY-box containing 9b clone MGC:76805IMAGE:6964230	gi|45501109|gb|BC067133.1|	Danio rerio SRY-box containing gene 9b, mRNA (cDNA clone MGC:76805 IMAGE:6964230), complete cds
Danio rerio SRY-box containing 9b sox9b	gi|18859410|ref|NM_131644.1|	Danio rerio SRY (sex determining region Y)-box 9b (sox9b), mRNA_x0001_AF277097.1 Danio rerio HMG box transcription factor Sox9b (sox9b) mRNA,complete cds
Danio rerio ST8alpha-N-acetyl-neuraminide alpha-2 8-sialyltransferase3 st8sia3	gi|164663765|ref|NM_001113432.1|	Danio rerio alpha-2,8-sialyltransferase ST8Sia III mRNA, complete cds
Danio rerio st8sia4	gi|150378464|ref|NM_001099416.1|	Danio rerio ST8 alpha-N-acetyl-neuraminide alpha-2,8-sialyltransferase 4 (st8sia4), mRNA_x0001_DQ779599.1 Danio rerio N-glycan alpha 2,8-sialyltransferase (pst) mRNA,complete cds
Danio rerio strain abTFsox9a sox9a	gi|24429610|gb|AY090034.1|	Danio rerio strain ab transcription factor sox9a (sox9a) gene, complete cds
Danio rerio strain jef mutantTFsox9a sox9a sox9a-tw37allele	gi|24429614|gb|AY090036.1|	Danio rerio strain jef mutant transcription factor sox9a (sox9a) gene, sox9a-tw37 allele, complete cds
Danio rerio strain tueTFsox9a sox9a	gi|24429612|gb|AY090035.1|	Danio rerio strain tue transcription factor sox9a (sox9a) gene, complete cds
Danio rerio T-box16 tbx16	gi|18859448|ref|NM_131058.1|	Danio rerio T-box 16 (tbx16), mRNA_x0001_AF077225.1 Danio rerio spadetail (spt) mRNA, complete cds
Danio rerio T-box20 tbx20	gi|18859450|ref|NM_131506.1|	Danio rerio T-box transcription factor (tbx20) mRNA, complete cds
Danio rerio terra	gi|11907966|gb|AF305094.1|AF305094	Danio rerio terra gene, complete cds
Danio rerio TF SOX3	gi|82568657|dbj|AB242330.1|	Danio rerio sox3 mRNA for transcription factor SOX3, complete cds
Danio rerio titina	XM_017357900.1	PREDICTED: Danio rerio titin a (ttna), mRNA
Danio rerio titinb	XM_017357911.1	PREDICTED: Danio rerio titin b (ttnb), transcript variant X11, mRNA
Danio rerio tolloid-like1 tll1	gi|18859498|ref|NM_131010.1|	Danio rerio tolloid-like 1 (tll1), mRNA_x0001_AF027596.1 Danio rerio tolloid mRNA, complete cds
Danio rerio v-erb-a erythroblastic leukemia viral oncogen homolog 4a avian erbb4a	gi|219555691|ref|NM_001143751.1|	Danio rerio erb-b2 receptor tyrosine kinase 4a (erbb4a), mRNA_x0001_EF190457.1 Danio rerio ErbB4 mRNA, complete cds
Danio rerio v-erb-b2 erythroblastic leukemia viral oncogen homolog 3a erbb3a	gi|52627196|ref|NM_001005320.1|	Danio rerio erb-b2 receptor tyrosine kinase 3a (erbb3a), mRNA
Danio rerio v-Ha-ras Harvey rat sarcoma viral oncogen homologa hrasa	gi|62955214|ref|NM_001017623.1|	Danio rerio v-Ha-ras Harvey rat sarcoma viral oncogene homolog a (hrasa), mRNA_x0001_BC092826.1 Danio rerio v-Ha-ras Harvey rat sarcoma viral oncogene homolog,mRNA (cDNA clone MGC:110250 IMAGE:7397929), complete cds
Danio rerio v-Ki-ras2 Kirsten rat sarcoma viral oncogen homolog kras	gi|51230608|ref|NM_001003744.1|	Danio rerio v-Ki-ras2 Kirsten rat sarcoma viral oncogene homolog (kras), mRNA_x0001_BC078646.1 Danio rerio v-Ki-ras2 Kirsten rat sarcoma viral oncogene homolog,mRNA (cDNA clone MGC:85725 IMAGE:6968999), complete cds
Danio rerio v-raf murine sarcoma viral oncogen homologB1 braf	gi|58330887|ref|NM_205744.3|	Danio rerio BRAF mRNA for serine/threonine protein kinase BRAF, complete cds
Danio rerio wingless-type MMTV integration site family member4a clone MGC:194977IMAGE:9038609	gi|190340129|gb|BC163457.1|	Danio rerio wingless-type MMTV integration site family, member 4a, mRNA (cDNA clone MGC:194994 IMAGE:9038611), complete cds_x0001_BC163457.1 Danio rerio wingless-type MMTV integration site family, member 4a, mRNA (cDNA clone MGC:194977 IMAGE:9038609), complete cds
Danio rerio wingless-type MMTV integration site family member4a clone MGC:194994IMAGE:9038611	gi|190338415|gb|BC163474.1|	Danio rerio wingless-type MMTV integration site family, member 4a, mRNA (cDNA clone MGC:194994 IMAGE:9038611), complete cds_x0001_BC163457.1 Danio rerio wingless-type MMTV integration site family, member 4a, mRNA (cDNA clone MGC:194977 IMAGE:9038609), complete cds
Danio rerio wingless-type MMTV integration site family member4b clone MGC:193624IMAGE:9037792	gi|190336669|gb|BC162132.1|	Danio rerio wingless-type MMTV integration site family, member 4b, mRNA (cDNA clone MGC:193624 IMAGE:9037792), complete cds
Danio rerio wingless-type MMTV integration site family member4b clone MGC:193639IMAGE:9037693	gi|190339267|gb|BC162139.1|	Danio rerio wingless-type MMTV integration site family, member 4b, mRNA (cDNA clone MGC:193639 IMAGE:9037693), complete cds
Danio rerio wingless-type MMTV integration site family member4b clone MGC:193748IMAGE:9037917	gi|190336749|gb|BC162540.1|	Danio rerio wingless-type MMTV integration site family, member 4b, mRNA (cDNA clone MGC:193748 IMAGE:9037917), complete cds
Danio rerio wingless-type MMTV integration site family member4b clone MGC:193777IMAGE:9037913	gi|190336770|gb|BC162551.1|	Danio rerio wingless-type MMTV integration site family, member 4b, mRNA (cDNA clone MGC:193777 IMAGE:9037913), complete cds
Danio rerio wingless-type MMTV integration site family member4b wnt4b	gi|18859564|ref|NM_131500.1|	Danio rerio wingless-type MMTV integration site family, member 4b (wnt4b), mRNA_x0001_AF139536.1 Danio rerio Wnt4b protein (wnt4b) mRNA, complete cds
Danio rerio wingless-typeMMTV integration site family member4a wnt4a	gi|94536696|ref|NM_001040387.1|	Danio rerio wingless-type MMTV integration site family, member 4a (wnt4a), mRNA_x0001_BC115247.1 Danio rerio wingless-type MMTV integration site family, member 4a, mRNA (cDNA clone MGC:136737 IMAGE:7993295), complete cds
Danio rerio Wnt4	gi|1256775|gb|U51267.1|DRU51267	Danio rerio Wnt4 (wnt4) mRNA, complete cds
Danio rerio Wnt4 protein wnt4 DRU25141	gi|841435|gb|U25141.1|DRU25141	Danio rerio Wnt4 protein (wnt4) mRNA, complete cds
Danio rerio zgc:101766 clone MGC:101766IMAGE:7229863	gi|53734062|gb|BC083273.1|	Danio rerio zgc:101766, mRNA (cDNA clone MGC:101766 IMAGE:7229863), complete cds
Danio rerio zic family member1 odd-paired homolog Drosophila zic1	gi|18859576|ref|NM_130933.1|	Danio rerio zic family member 1 (odd-paired homolog, Drosophila) (zic1), mRNA_x0001_AF052435.1 Danio rerio odd-paired-like (opl) mRNA, complete cds
Dicentrarchus labrax androgen receptor	gi|50400171|gb|AY647256.1|	Dicentrarchus labrax androgen receptor mRNA, complete cds
Dicentrarchus labrax Sox17protein Sox17 alternatively spliced	gi|208657231|gb|EU761243.1|	Dicentrarchus labrax Sox17 protein (Sox17) gene, complete cds, alternatively spliced
Dicentrarchus labrax vasa-like protein	gi|301602400|gb|GU987023.1|	Dicentrarchus labrax vasa-like protein mRNA, complete cds
Drosophila melanogaster dme:Dmel CG18350Sxl;Sexlethal N	NM_001031891.3	Drosophila melanogaster Sex lethal (Sxl), transcript variant O, mRNA
Gadus morhua anti-mullerian hormone amh	gi|317140404|gb|HQ630631.1|	Gadus morhua anti-mullerian hormone (amh) mRNA, partial cds
Gadus morhua SRY-box containing protein9 sox9	gi|317140388|gb|HQ630630.1|	Gadus morhua SRY-box containing protein 9 (sox9) mRNA, partial cds
Gadus morhua vasa-like protein vasa	gi|317140422|gb|HQ630632.1|	Gadus morhua vasa-like protein (vasa) mRNA, partial cds
Gasterosteus aculeatus clone CFW170-D08 sequence	gi|112420281|gb|BT027098.1|	Gasterosteus aculeatus clone CFW170-D08 mRNA sequence
Gasterosteus aculeatus DMRT1 Dmrt1	gi|58003759|gb|AY867870.1|	Gasterosteus aculeatus doublesex and mab-3 related transcription factor 1 (dmrt1), mRNA_x0001_AY867870.1 Gasterosteus aculeatus DMRT1 (Dmrt1) mRNA, complete cds
Gasterosteus aculeatus FBXW2	ENSGACT00000024240	Gasterosteus aculeatus F-box/WD repeat-containing protein2-like
Gasterosteus aculeatus LHX2 group 13	ENSGACT00000004639	Gasterosteus aculeatus LIM homeobox 2a [Source:ZFIN;Acc:ZDB-GENE-091118-109]
Gasterosteus aculeatus MMP11	ENSGACT00000024369	Gasterosteus aculeatusMatrix metallopeptidase 11b [Source:ZFIN;Acc:ZDB-GENE-070817-2]
Gasterosteus aculeatus NR5a1 2	ENSGACT00000024271	Gasterosteus aculeatus Nuclear receptor subfamily 5, group A, member 1a [Source:ZFIN;Acc:ZDB-GENE-010504-1] groupXIV:13 848 579:13 856 678
Gasterosteus aculeatus NR5a1 1 Gasterosteus aculeatus	ENSGACT00000004669	Gasterosteus aculeatus Nuclear receptor subfamily 5, group A, member 1b [Source:ZFIN;Acc:ZDB-GENE-040702-6] groupXIII:732 331-745 071
Gasterosteus aculeatus NR6a1	ENSGACT00000004682	Gasterosteus aculeatus Nuclear hormone receptor 6a1 groupXIII:768441:773411
Gasterosteus aculeatus NR6a1	ENSGACT00000004676	Gasterosteus aculeatus Nuclear hormone receptor 6a1 groupXIII:768298:822763
Gasterosteus aculeatus NR6a1 miRNA	ENSGACG00000022291	Gasterosteus aculeatus microRNA of NR6A1 groupXIII:805341-805427:1
Gasterosteus aculeatus NR6a1 miRNA	ENSGACT00000028313	Gasterosteus aculeatus miRNA of NR6A1 groupXIII:805167-805238: 1microRNA
Gasterosteus aculeatus PIWI L1-	ENSGACT00000016208	Gasterosteus aculeatus piwi like RNA-mediated gene silencing 1 (piwil1) groupXIII:14130304:14138199
Gasterosteus aculeatus PIWI L2	ENSGACT00000017015	Gasterosteus aculeatus piwi like RNA-mediated gene silencing 2 (piwil2) groupXIII:14873838:14880241
Gasterosteus aculeatus POGK 1 of 3	ENSGACT00000024402	Gasterosteus aculeatus Pogo transposable element with KRAB domain (pogk)
Gasterosteus aculeatus Sox9bTF	gi|34223472|gb|AY351915.1|	Gasterosteus aculeatus Sox9b transcription factor gene, complete cds
Gasterosteus aculeatus SPAG16	ENSGACT00000024236	Gasterosteus aculeatus Sperm associated antigen 16 (spag16)
Gasterosteus aculeatus spin2B cdna	ENSGACG00000018280:ENSGACT00000024212	Gasterosteus aculeatus Spindlin family member 2B [Source:HGNC Symbol;Acc:HGNC:33147] cDNA
Gasterosteus aculeatus spin2B intron 1	ENSGACG00000018280:ENSGACT00000024212	Gasterosteus aculeatus Spindlin family member 2B [Source:HGNC Symbol;Acc:HGNC:33147] intron 1
Gasterosteus aculeatus spin2B intron 2	ENSGACG00000018280:ENSGACT00000024212	Gasterosteus aculeatus Spindlin family member 2B [Source:HGNC Symbol;Acc:HGNC:33147] intron 2
Gasterosteus aculeatus spin2B intron 3	ENSGACG00000018280:ENSGACT00000024212	Gasterosteus aculeatus Spindlin family member 2B [Source:HGNC Symbol;Acc:HGNC:33147] intron 3
Gasterosteus aculeatus SPR1 cDNA	ENSGACT00000024511	Gasterosteus aculeatus Sepiapterin reductase (7,8-dihydrobiopterin:NADP+ oxidoreductase) [Source:HGNC Symbol;Acc:HGNC:11257]
Haplochromis burtoni follicle stimulating hormone beta subunit	gi|312183688|gb|HQ147566.1|	Haplochromis burtoni follicle stimulating hormone beta subunit mRNA, partial cds
Haplochromis burtoni luteinizing hormone beta subunit	gi|312183686|gb|HQ147565.1|	Haplochromis burtoni luteinizing hormone beta subunit mRNA, partial cds
Hippoglossus hippoglossus estrogen receptor alpha	gi|83316219|gb|DQ302136.1|	Hippoglossus hippoglossus estrogen receptor alpha mRNA, partial cds
Hippoglossus hippoglossus estrogen receptor beta ERB	gi|82658058|emb|AJ605599.2|	Hippoglossus hippoglossus partial mRNA for estrogen receptor beta (ERB gene)
Ictalurus punctatus clone CBCZ13309btg1 BTG1	gi|308323328|gb|GU588847.1|	Ictalurus punctatus B-cell translocation gene 1 (btg1), mRNA_x0001_GU588847.1 Ictalurus punctatus clone CBCZ13309 btg1 (BTG1) mRNA, complete cds
Ictalurus punctatus clone CBFA1507magonashi-like MGN	gi|308323380|gb|GU588873.1|	Ictalurus punctatus mago nashi-like (mgn), mRNA_x0001_GU588873.1 Ictalurus punctatus clone CBFA1507 mago nashi-like (MGN) mRNA,complete cds
Ictalurus punctatus clone CBZA37437cell differentiation protein rcd1-like protein RCD1	gi|308323866|gb|GU589117.1|	Ictalurus punctatus CCR4-NOT transcription complex subunit 9 (cnot9), mRNA_x0001_GU589117.1 Ictalurus punctatus clone CBZA37437 cell differentiation protein rcd1-like protein (RCD1) mRNA, complete cds
Ictalurus punctatus clone CBZB17889 gremlin-2 GREM2	gi|308324135|gb|GU589252.1|	Ictalurus punctatus gremlin 2, DAN family BMP antagonist (grem2), mRNA_x0001_GU589252.1 Ictalurus punctatus clone CBZB17889 gremlin-2 (GREM2) mRNA, complete cds
Menidia menidia gonadal aromataseP450	gi|227132750|gb|FJ861317.1|	Menidia menidia gonadal aromatase P450 mRNA, partial cds
Nothobranchius furzeri strain GRZ melanocortin1 receptor Mc1r	gi|283971030|gb|GQ463613.1|	Nothobranchius furzeri melanocortin 1 receptor (mc1r), mRNA_x0001_GQ463613.1 Nothobranchius furzeri strain GRZ melanocortin 1 receptor (Mc1r)mRNA, complete cds
Odontesthes bonariensis follicle stimulating hormone receptor fshr	gi|255686588|gb|GQ258853.1|	Odontesthes bonariensis follicle stimulating hormone receptor (fshr) mRNA, complete cds
Odontesthes bonariensis luteinizing hormone receptor lhr	gi|255686586|gb|GQ258852.1|	Odontesthes bonariensis luteinizing hormone receptor (lhr) mRNA, complete cds
Odontesthes bonariensis mullerian inhibitory substance MIS	gi|86611370|gb|AY763406.2|	Odontesthes bonariensis mullerian inhibitory substance (MIS) mRNA, complete cds
Odontesthes hatcheri gonadalaromatase cyp19a1a promoter region and 5'UTR	gi|254209531|gb|GQ274004.1|	Odontesthes hatcheri gonadal aromatase (cyp19a1a) gene, promoter region and 5' UTR
Oncorhynchus mykiss cloneomyk-evn-510-065 Mitogen-activated protein kinase kinase kinase kinase5	gi|225703889|gb|BT073367.1|	Oncorhynchus mykiss Mitogen-activated protein kinase kinase kinase kinase 5 (m4k5), mRNA_x0001_BT073367.1 Oncorhynchus mykiss clone omyk-evn-510-065 Mitogen-activated protein kinase kinase kinase kinase 5 putative mRNA, complete cds
Oncorhynchus mykiss GSDF2	XM_014172058.1	PREDICTED: Salmo salar bone morphogenetic protein 6-like (LOC106585642), mRNA
Oncorhynchus mykiss MAPK ERKkinase tmek	gi|185133169|ref|NM_001124424.1|	Oncorhynchus mykiss MAPK /ERK kinase (tmek), mRNA_x0001_AJ966781.2 Oncorhynchus mykiss mRNA for MAPK/ERK kinase (tMEK gene)
Oreochromis aureus SF-1	gi|76160805|gb|DQ195677.1|	Oreochromis aureus SF-1 mRNA, complete cds
Oreochromis mossambicus FSH beta subunit	gi|15077118|gb|AF289174.1|	Oreochromis mossambicus follicle stimulating hormone beta subunit mRNA, complete cds
Oreochromis mossambicus LH beta subunit	gi|46277244|gb|AY541609.1|	Oreochromis mossambicus LH beta subunit mRNA, partial cds
Oreochromis niloticus aromatase typeII	gi|41059433|gb|AY513716.1|	Oreochromis niloticus aromatase type II mRNA, partial cds
Oreochromis niloticus cytochromeP450 aromatase typeII	gi|48686719|gb|AF295761.3|	Oreochromis niloticus brain aromatase (LOC100534396), mRNA_x0001_AF295761.3 Oreochromis niloticus cytochrome P450 aromatase type II mRNA,complete cds
Oreochromis niloticus FSH beta subunit	gi|31559050|gb|AY294015.1|	PREDICTED: Oreochromis niloticus follicle stimulating hormone, beta polypeptide (fshb), transcript variant X1, mRNA
Oreochromis niloticus gonadotropin alpha subunit	gi|31559056|gb|AY294017.1|	Oreochromis niloticus glycoprotein hormones, alpha polypeptide (cga), mRNA_x0001_AY294017.1 Oreochromis niloticus gonadotropin alpha subunit mRNA, complete cds
Oreochromis niloticus LH beta subunit	gi|31559052|gb|AY294016.1|	Oreochromis niloticus LH beta subunit mRNA, complete cds
Oryzias celebensis zinc finger TF	gi|30088778|gb|AY239587.1|	Oryzias celebensis putative zinc finger transcription factor mRNA, complete cds
Oryzias curvinotus DMRT1 protein	gi|29027650|dbj|AB091696.1|	Oryzias curvinotus mRNA for DMRT1 protein, complete cds
Oryzias curvinotus DMY protein	gi|29027648|dbj|AB091695.1|	Oryzias curvinotus mRNA for DMY protein, complete cds
Oryzias curvinotus OcGCS-alpha1 mRMA for soluble guanylylcyclase alpha1 subunit	gi|33299966|dbj|AB115703.1|	Oryzias curvinotus OcGCS-alpha1 mRMA for soluble guanylyl cyclase alpha1 subunit, complete cds
Oryzias curvinotus OcGCS-alpha2 mRMA for soluble guanylylcyclase alpha2 subunit	gi|33299968|dbj|AB115704.1|	Oryzias curvinotus OcGCS-alpha2 mRMA for solble guanylyl cyclase alpha2 subunit, complete cds
Oryzias curvinotus OcGCS-beta1 soluble guanylyl cyclase beta1 subunit	gi|37360974|dbj|AB121231.1|	Oryzias curvinotus OcGCS-beta1 mRNA for soluble guanylyl cyclase beta1 subunit, complete cds
Oryzias curvinotus SCP3 synaptonemal compleprotein3	gi|78126091|dbj|AB212092.1|	Oryzias curvinotus SCP3 mRNA for synaptonemal complex protein 3, partial cds
Oryzias curvinotus Tyr for Tyrosinase	gi|6045184|dbj|AB032695.1|	Oryzias curvinotus Tyr gene for Tyrosinase, partial cds
Oryzias curvinotus zinc finger TF DMRT1	gi|37724019|gb|AY157713.1|	Oryzias curvinotus putative zinc finger transcription factor (DMRT1) mRNA, partial cds
Oryzias latipes for HOXB5A	gi|6252848|dbj|AB026959.1|	Oryzias latipes gene for HOXB5A, partial cds
Oryzias latipes for HOXB5B	gi|6252866|dbj|AB026962.1|	Oryzias latipes gene for HOXB5B, partial cds
Oryzias latipes for HOXD9B	gi|6252907|dbj|AB026968.1|	Oryzias latipes gene for HOXD9B, partial cds
Oryzias latipes for OlaDMRT4	gi|57864458|dbj|AB055958.2|	Oryzias latipes gene for OlaDMRT4, complete cds
Oryzias latipes for WNT4	gi|2366754|dbj|AB006573.1|	Oryzias latipes gene for WNT 4, partial cds
Oryzias latipes choriogeninH	gi|1711283|dbj|D89609.1|	Oryzias latipes mRNA for choriogenin H, complete cds
Oryzias latipes cyclinB1	gi|6729103|dbj|AB030069.1|	Oryzias latipes mRNA for cyclin B1, complete cds
Oryzias latipes cyclinB2	gi|6729105|dbj|AB030070.1|	Oryzias latipes mRNA for cyclin B2, complete cds
Oryzias latipes CytochromeP-450 C17 20-lyase	gi|1507675|dbj|D87121.1|	Oryzias latipes cytochrome P-450 17alpha-hydroxylase/C17,20-lyase (cyp17), mRNA_x0001_D87121.1 Oryzias latipes mRNA for Cytochrome P-450 17alpha-hydroxylase/C17,20-lyase,complete cds
Oryzias latipes CytochromeP-450 c17S	gi|1507677|dbj|D87122.1|	Oryzias latipes mRNA for Cytochrome P-450c17S, complete cds
Oryzias latipes DJ-1	gi|54792717|dbj|AB193829.1|	Oryzias latipes Parkinsonism associated deglycase (park7), mRNA_x0001_AB193829.1 Oryzias latipes mRNA for DJ-1, complete cds
Oryzias latipes DMY protein	gi|20522005|dbj|AB071534.1|	Oryzias latipes DMY protein (dmy), mRNA_x0001_AB071534.1 Oryzias latipes mRNA for DMY protein, complete cds
Oryzias latipes GSDF AB525390 mRNA	NM_001177742.1	Oryzias latipes gonadal soma derived factor (gsdf), complete cds
Oryzias latipes HOX2A	gi|6252784|dbj|AB026949.1|	Oryzias latipes mRNA for HOX2A, partial cds
Oryzias latipes HOX6A	gi|6252874|dbj|AB026963.1|	Oryzias latipes mRNA for HOX6A, partial cds
Oryzias latipes HOX8B	gi|6252895|dbj|AB026966.1|	Oryzias latipes mRNA for HOX8B, partial cds
Oryzias latipes HOXA10A	gi|6252961|dbj|AB026974.1|	Oryzias latipes mRNA for HOXA10A, partial cds
Oryzias latipes HOXA1A	gi|6252742|dbj|AB026948.1|	Oryzias latipes mRNA for HOXA1A, partial cds
Oryzias latipes HOXA2B	gi|6252791|dbj|AB026950.1|	Oryzias latipes mRNA for HOXA2B, partial cds
Oryzias latipes HOXA3A	gi|6252799|dbj|AB026951.1|	Oryzias latipes mRNA for HOXA3A, partial cds
Oryzias latipes HOXA4A	gi|6252819|dbj|AB026954.1|	Oryzias latipes mRNA for HOXA4A, partial cds
Oryzias latipes HOXA5A	gi|6252860|dbj|AB026961.1|	Oryzias latipes mRNA for HOXA5A, partial cds
Oryzias latipes HOXA9A	gi|6252949|dbj|AB026972.1|	Oryzias latipes homeobox A9 (hoxa9), mRNA_x0001_AB026972.1 Oryzias latipes mRNA for HOXA9A, complete cds
Oryzias latipes HOXA9B	gi|6252934|dbj|AB026971.1|	Oryzias latipes hoxa9b protein (hoxa9b), mRNA_x0001_AB026971.1 Oryzias latipes mRNA for HOXA9B, complete cds
Oryzias latipes HOXB1B	gi|6252732|dbj|AB026947.1|	Oryzias latipes mRNA for HOXB1B, partial cds
Oryzias latipes HOXB4A	gi|6252827|dbj|AB026956.1|	Oryzias latipes mRNA for HOXB4A, partial cds
Oryzias latipes HOXB6B	gi|6252881|dbj|AB026964.1|	Oryzias latipes mRNA for HOXB6B, partial cds
Oryzias latipes HOXB9A	gi|6252913|dbj|AB026969.1|	Oryzias latipes mRNA for HOXB9A, partial cds
Oryzias latipes HOXC10A	gi|6252955|dbj|AB026973.1|	Oryzias latipes mRNA for HOXC10A, partial cds
Oryzias latipes HOXC3A	gi|6252812|dbj|AB026953.1|	Oryzias latipes mRNA for HOXC3A, partial cds
Oryzias latipes HOXC4A	gi|6274503|dbj|AB026955.1|	Oryzias latipes mRNA for HOXC4A, complete cds
Oryzias latipes HOXC5A	gi|6252854|dbj|AB026960.1|	Oryzias latipes mRNA for HOXC5A, partial cds
Oryzias latipes HOXC8A	gi|6252889|dbj|AB026965.1|	Oryzias latipes mRNA for HOXC8A, partial cds
Oryzias latipes HOXC9A	gi|6274505|dbj|AB026970.1|	Oryzias latipes homeobox C9 (hoxc9), mRNA_x0001_AB026970.1 Oryzias latipes mRNA for HOXC9A, complete cds
Oryzias latipes HOXD10A	gi|6252967|dbj|AB026975.1|	Oryzias latipes mRNA for HOXD10A, partial cds
Oryzias latipes HOXD3A	gi|6252806|dbj|AB026952.1|	Oryzias latipes mRNA for HOXD3A, partial cds
Oryzias latipes HOXD4A	gi|6252841|dbj|AB026958.1|	Oryzias latipes mRNA for HOXD4A, partial cds
Oryzias latipes HOXD4B	gi|6252833|dbj|AB026957.1|	Oryzias latipes mRNA for HOXD4B, partial cds
Oryzias latipes HOXD9A	gi|6252901|dbj|AB026967.1|	Oryzias latipes homeobox D9 (hoxd9), mRNA_x0001_AB026967.1 Oryzias latipes mRNA for HOXD9A, complete cds
Oryzias latipes HSD17B3	gi|145910304|gb|EF530598.1|	PREDICTED: Oryzias latipes hydroxysteroid (17-beta) dehydrogenase 3 (hsd17b3), transcript variant X2, mRNA
Oryzias latipes L-Sfprecursor ORZLSF	gi|1060937|dbj|D38630.1|	Oryzias latipes mRNA for L-SF precursor, complete cds
Oryzias latipes Mhc classIA	gi|4803839|dbj|AB026977.1|	Oryzias latipes Mhc class I A (orla-uaa), mRNA_x0001_AB026977.1 Oryzias latipes mRNA for Mhc class I A, complete cds
Oryzias latipes NR5A2-like (LOC101158123), mRNA on Chr12	XM_011482028.1	Oryzias latipes nuclear receptor subfamily 5 group A member 2-like (LOC101158123), mRNA
Oryzias latipes NR6A1 LG9	ENSORLT00000020647	Oryzias latipes Nuclear hormone receptor 6a1 LG9:27880221:27901714
Oryzias latipes PDX	gi|6252973|dbj|AB026976.1|	Oryzias latipes mRNA for PDX, partial cds
Oryzias latipes PIWIL1 LG9	ENSORLT00000017182	Oryzias latipes Piwi-like protein 1, RNA-mediated gene silencing [Source:RefSeq peptide;Acc:NP_001153908] LG9:19 921 196-19 938 9421
Oryzias latipes PIWIL2 LG13	ENSORLT00000017132	Oryzias latipes piwi like RNA-mediated gene silencing 2 (piwil2) LG13:26712415:26724720
Oryzias latipes protamine ORZP	gi|961485|dbj|D63796.1|ORZP	Oryzias latipes mRNA for protamine, complete cds
Oryzias latipes SMC1alpha	gi|31088221|dbj|AB097255.1|	Oryzias latipes mRNA for SMC1 alpha, partial cds
Oryzias latipes ABCB3 ABC-transporter subfamily-Btype3 strain:Hd-rR	gi|295901517|dbj|AB450977.1|	Oryzias latipes ABCB3 mRNA for ABC-transporter subfamily-B type 3, complete cds, strain: Hd-rR
Oryzias latipes Agouti related protein	ENSORLT00000000487.1	Oryzias latipesAgouti-related cDNA 3:4162350-4162547:-1
Oryzias latipes androgen receptor	gi|5815423|gb|AF178118.1|	Oryzias latipes androgen receptor mRNA, partial cds
Oryzias latipes anti-mullerian hormone amh	gi|58802926|gb|AY899284.1|	Oryzias latipes anti-mullerian hormone (amh) gene, partial cds
Oryzias latipes aristaless-related homeobox protein	gi|157410506|gb|EU048547.1|	Oryzias latipes aristaless related homeobox (arx), mRNA_x0001_EU048547.1 Oryzias latipes aristaless-related homeobox protein mRNA, complete cds
Oryzias latipes brain aromatase CYP19B	gi|32478197|gb|AY319970.1|	Oryzias latipes brain aromatase (CYP19B) mRNA, complete cds
Oryzias latipes bromodomain and PHD finger containing 1 brpf1	gi|251823737|ref|NM_001163082.1|	Oryzias latipes bromodomain and PHD finger containing 1 (brpf1), mRNA_x0001_AB488461.1 Oryzias latipes Brpf1 mRNA for bromodomain and PHD finger containing,1, complete cds
Oryzias latipes Brpf1 bromodomain and PHD finger containing 1	gi|237823391|dbj|AB488461.1|	Oryzias latipes bromodomain and PHD finger containing 1 (brpf1), mRNA_x0001_AB488461.1 Oryzias latipes Brpf1 mRNA for bromodomain and PHD finger containing,1, complete cds
Oryzias latipes Brpf1 bromodomain and PHD finger containing 1	gi|237823391|dbj|AB488461.1|	Oryzias latipes bromodomain and PHD finger containing 1 (brpf1), mRNA_x0001_AB488461.1 Oryzias latipes Brpf1 mRNA for bromodomain and PHD finger containing,1, complete cds
Oryzias latipes cdna Corin	ENSORLT00000023716	Oryzias latipes Corin, serine peptidase [Source:HGNC Symbol;Acc:HGNC:19012]
Oryzias latipes choriogeninH	gi|21326030|gb|AF500195.1|	Oryzias latipes choriogenin H gene, complete cds
Oryzias latipes choriogeninL	gi|21326028|gb|AF500194.1|	Oryzias latipes choriogenin L gene, complete cds
Oryzias latipes clone FS30-1ZP1- related protein	gi|5230680|gb|AF072187.1|	Oryzias latipes clone FS30-1 ZP1-related protein mRNA, partial cds
Oryzias latipes clone FS30-2 choriogeninH- related protein	gi|5230682|gb|AF072188.1|	Oryzias latipes clone FS30-2 choriogenin H-related protein mRNA, partial cds
Oryzias latipes clone FS30-3 CPEB-related RNA binding protein	gi|5230684|gb|AF072189.1|	Oryzias latipes clone FS30-3 CPEB-related RNA binding protein mRNA, partial cds
Oryzias latipes clone FS30-4 cathepsinS related protein	gi|5230686|gb|AF072190.1|	Oryzias latipes clone FS30-4 cathepsinS related protein mRNA, partial cds
Oryzias latipes clone FS30-5 choriolysinL- related protein	gi|5230688|gb|AF072191.1|	Oryzias latipes clone FS30-5 choriolysin L-related protein mRNA, partial cds
Oryzias latipes clone FS30-6 endopeptidase- related protein	gi|5230690|gb|AF072192.1|	TPA_asm: Oryzias latipes strain Hd-rR, complete genome assembly, chromosome 13
Oryzias latipes clone FS30-8 LDLreceptor- related protein	gi|5230692|gb|AF072194.1|	Oryzias latipes clone FS30-8 LDL receptor-related protein mRNA, partial cds
Oryzias latipes cnp-1 C-type natriuretic peptide-1	gi|22830874|dbj|AB081455.1|	Oryzias latipes cnp-1 mRNA for C-type natriuretic peptide-1, complete cds
Oryzias latipes cnp-2 C-type natriuretic peptide-2	gi|22830876|dbj|AB081456.1|	Oryzias latipes natriuretic peptide B (nppb), mRNA_x0001_AB081456.1 Oryzias latipes cnp-2 mRNA for C-type natriuretic peptide-2,complete cds
Oryzias latipes cnp-3 C-type natriuretic peptide-3	gi|29027652|dbj|AB091698.1|	Oryzias latipes cnp-3 mRNA for C-type natriuretic peptide-3, complete cds
Oryzias latipes cnp-4 C-type natriuretic peptide-4	gi|29027654|dbj|AB091699.1|	Oryzias latipes cnp-4 mRNA for C-type natriuretic peptide-4, complete cds
Oryzias latipes CRB2 crb2a-201	ENSORLT00000015846	Oryzias latipes Crumbs family member 2a [Source:ZFIN;Acc:ZDB-GENE-060612-1] LG12:23778077-23793725:1
Oryzias latipes CRB2b LG9	ENSORLT00000020612	Oryzias latipes Crumbs family member 2b [Source:ZFIN;Acc:ZDB-GENE-060610-1] LG9:27354995-27377785:1
Oryzias latipes cyp17 gen for P450c17	gi|78183400|dbj|AB212274.1|	Oryzias latipes cyp17 gene for P450c17, partial cds_x0001_AB212275.1 Oryzias latipes cyp17 pseudogene mRNA for P450c17scl
Oryzias latipes cyp17 pseudogen P450c17scl	gi|78183402|dbj|AB212275.1|	Oryzias latipes cyp17 gene for P450c17, partial cds_x0001_AB212275.1 Oryzias latipes cyp17 pseudogene mRNA for P450c17scl
Oryzias latipes cyp19a1b aromataseB	gi|324120773|dbj|AB591736.1|	Oryzias latipes cyp19a1b mRNA for aromatase B, complete cds
Oryzias latipes CYP2K1	gi|145910279|gb|EF530595.1|	Oryzias latipes cytochrome P450 monooxygenase CYP2K1 (CYP2K1) mRNA, partial cds
Oryzias latipes cytochrome P45011 beta	gi|119214911|gb|EF025509.1|	Oryzias latipes cytochrome P450 11beta mRNA, partial cds
Oryzias latipes cytochromeP45011beta cyp11b	gi|157311690|ref|NM_001105100.1|	Oryzias latipes cytochrome P450 11beta (cyp11b), mRNA_x0001_AB105880.1 Oryzias latipes CYP 11B mRNA for cytochrome P450 11beta, complete cds
Oryzias latipes cytochromeP45019b cyp19b	gi|157311676|ref|NM_001105093.1|	Oryzias latipes brain aromatase (CYP19B) mRNA, complete cds
Oryzias latipes developing brain homeobox1b	gi|157410508|gb|EU048548.1|	Oryzias latipes developing brain homeobox 1b (LOC100144364), mRNA_x0001_EU048548.1 Oryzias latipes developing brain homeobox 1b mRNA, complete cds
Oryzias latipes diencephalon mesencephalon homeobox1 isoform Mbx-L	gi|157410511|gb|EU048549.1|	PREDICTED: Oryzias latipes diencephalon/mesencephalon homeobox 1 (dmbx1), transcript variant X1, mRNA
Oryzias latipes Dmrt1-B Dmrt1 alternatively spliced	gi|49066640|gb|AY524418.1|	Oryzias latipes Dmrt1-B (Dmrt1) mRNA, partial cds, alternatively spliced
Oryzias latipes Dmrt1-C Dmrt1 alternatively spliced	gi|49066642|gb|AY524419.1|	Oryzias latipes Dmrt1-C (Dmrt1) mRNA, partial cds, alternatively spliced
Oryzias latipes Dmrt1Y alternatively spliced	gi|42409655|gb|AY450843.1|	Oryzias latipes Dmrt1Y mRNA, partial cds, alternatively spliced
Oryzias latipes Dmt-b Dmy alternatively spliced	gi|49066636|gb|AY524416.1|	Oryzias latipes doublesex- and mab-3-related transcription factor 1Y-like (LOC101165029), mRNA_x0001_AY524416.1 Oryzias latipes Dmt-b (Dmy) mRNA, complete cds, alternatively spliced
Oryzias latipes DMY DMYprotein	gi|31376301|dbj|AB111358.1|	Oryzias latipes DMY mRNA for DMY protein, partial cds
Oryzias latipes DMYprotein dmy	gi|157278101|ref|NM_001104680.1|	Oryzias latipes DMY protein (dmy), mRNA_x0001_AB071534.1 Oryzias latipes mRNA for DMY protein, complete cds
Oryzias latipes DNA sex linked sequence Yc-1 sequence tagged site	gi|7594813|dbj|AB033606.1|	TPA_asm: Oryzias latipes strain Hd-rR, complete genome assembly, chromosome 1
Oryzias latipes DNA sex linked sequence Yc-2 sequence tagged site	gi|7594814|dbj|AB033607.1|	TPA_asm: Oryzias latipes strain Hd-rR, complete genome assembly, chromosome 1
Oryzias latipes doublesex and mab-3-related TF1c Dmrt1 alternatively spliced	gi|40748274|gb|AY442916.1|	Oryzias latipes doublesex and mab-3 related transcription factor 1 c (Dmrt1) mRNA, complete cds, alternatively spliced
Oryzias latipes earlygrowthresponseprotein2	gi|186966074|gb|EU493253.1|	Oryzias latipes early growth response protein 2 mRNA, partial cds
Oryzias latipes eed embryonic ectoderm development protein	gi|48147236|dbj|AB180923.1|	Oryzias latipes embryonic ectoderm development (eed), mRNA_x0001_AB180923.1 Oryzias latipes oleed mRNA for embryonic ectoderm development protein, complete cds
Oryzias latipes Egr2 mRNA	XM_004080784.2	PREDICTED: Oryzias latipes early growth response 2 (egr2), mRNA
Oryzias latipes embryonic ectoderm development protein oleed	gi|157278446|ref|NM_001104856.1|	Oryzias latipes embryonic ectoderm development (eed), mRNA_x0001_AB180923.1 Oryzias latipes oleed mRNA for embryonic ectoderm development protein, complete cds
Oryzias latipes ErbB3 1	XM_011474665.1	PREDICTED: Oryzias latipes erb-b2 receptor tyrosine kinase 3 (erbb3), mRNA
Oryzias latipes ErbB3_like	XM_011477097.1	PREDICTED: Oryzias latipes receptor tyrosine-protein kinase erbB-3-like (LOC101172978), mRNA
Oryzias latipes FBXW4, fbxw4-201 LG15	ENSORLT00000001106	Oryzias latipes F-box and WD repeat domain containing 4 [Source:ZFIN;Acc:ZDB-GENE-000516-1]
Oryzias latipes fgf20a fibroblast growth factor20a	gi|113208312|dbj|AB270901.1|	Oryzias latipes fgf20a mRNA for fibroblast growth factor 20a, complete cds
Oryzias latipes fgf20b fibroblast growth factor20b	gi|113208314|dbj|AB270902.1|	Oryzias latipes fibroblast growth factor 20b (fgf20b), mRNA_x0001_AB270902.1 Oryzias latipes fgf20b mRNA for fibroblast growth factor 20b,complete cds
Oryzias latipes fgfr3 fibroblast growth factor receptor3	gi|113208316|dbj|AB270903.1|	Oryzias latipes fgfr3 mRNA for fibroblast growth factor receptor 3, partial cds
Oryzias latipes fibroblast growth factor 20a fgf20a	gi|157278218|ref|NM_001104739.1|	Oryzias latipes fgf20a mRNA for fibroblast growth factor 20a, complete cds
Oryzias latipes fibroblast growth factor 20b fgf20b	gi|157278220|ref|NM_001104740.1|	Oryzias latipes fibroblast growth factor 20b (fgf20b), mRNA_x0001_AB270902.1 Oryzias latipes fgf20b mRNA for fibroblast growth factor 20b,complete cds
Oryzias latipes forkhead boxL2 foxl2	gi|157278512|ref|NM_001104888.1|	Oryzias latipes forkhead box L2 (foxl2), mRNA_x0001_AB252055.1 Oryzias latipes Foxl2 mRNA for forkhead box L2, complete cds
Oryzias latipes FOXD3	ENSORLT00000012978	Oryzias latipes forkhead box D3 (LOC100301607), mRNA. [Source:RefSeq mRNA;Acc:NM_001160453] LG 4:17170902:17172098
Oryzias latipes FTZ-F1 mdftz-f1	gi|157278132|ref|NM_001104696.1|	Oryzias latipes nuclear receptor subfamily 5 group A member 1 (nr5a1), mRNA_x0001_AB016834.1 Oryzias latipes mRNA for FTZ-F1, complete cds
Oryzias latipes G6F-like protein g6f-like	gi|305410794|ref|NM_001195236.1|	Oryzias latipes G6F-like protein (g6f-like), mRNA_x0001_GU393009.1 Oryzias latipes G6F-like protein (G6F-like) mRNA, complete cds
Oryzias latipes GAS1b cdna	ENSORLT00000003707	Growth arrest-specific 1b [Source:ZFIN;Acc:ZDB-GENE-050302-79] cDNA
Oryzias latipes growth arrest specific 1 GAS1	HF933218.1	TPA_asm: Oryzias latipes strain Hd-rR, complete genome assembly, chromosome 12
Oryzias latipes HCE for choriolysinH	gi|1236248|dbj|D83950.1|ORGHCEB	Oryzias latipes HCE gene for choriolysin H (a constituent of medaka hatching enzyme), complete cds
Oryzias latipes Hoxa2a	gi|187438862|gb|EU483626.1|	Oryzias latipes Hoxa2a mRNA, partial cds
Oryzias latipes Hoxa2b Hoxa2b pseudo partial sequence	gi|187438864|gb|EU483627.1|	Oryzias latipes Hoxa2b (Hoxa2b) pseudogene mRNA, partial sequence
Oryzias latipes Hoxb2a	gi|187438865|gb|EU483628.1|	Oryzias latipes Hoxb2a mRNA, partial cds
Oryzias latipes hoxc8a protein hoxc8a	gi|253795456|ref|NM_001163250.1|	Oryzias latipes homeobox C8 (hoxc8), mRNA
Oryzias latipes hydroxysteroid11-betadehydrogenase2 Hsd11b2	gi|118027146|gb|DQ991146.1|	PREDICTED: Oryzias latipes corticosteroid 11-beta-dehydrogenase isozyme 2 (LOC100125474), mRNA
Oryzias latipes IGF1	XM_011491273.1	PREDICTED: Oryzias latipes insulin-like growth factor 1 (somatomedin C) (igf1), transcript variant X1, mRNA
Oryzias latipes KCNH1 5081	XM_004077284.2	PREDICTED: Oryzias latipes potassium voltage-gated channel subfamily H member 1-like (LOC101155792), mRNA
Oryzias latipes KCNH2	XM_011480197.1	PREDICTED: Oryzias latipes potassium voltage-gated channel subfamily H member 1 (LOC101170816), mRNA
Oryzias latipes kiss-2 kisspeptin	gi|215490200|dbj|AB439562.1|	Oryzias latipes kisspeptin (kiss-2), mRNA_x0001_AB439562.1 Oryzias latipes kiss-2 mRNA for kisspeptin, complete cds
Oryzias latipes kit lg	XM_011472884.1	PREDICTED: Oryzias latipes KIT ligand (kitlg), mRNA
Oryzias latipes LCE for choriolysinL exon1-8	gi|1236249|dbj|D83949.1|ORZLCEA	Oryzias latipes LCE gene for choriolysin L (a constituent of medaka hatching enzyme), exon1-8, complete cds
Oryzias latipes LIM homeobox protein Lhx3	gi|157410514|gb|EU048550.1|	Oryzias latipes LIM homeobox 3 (lhx3), mRNA_x0001_EU048550.1 Oryzias latipes LIM/homeobox protein Lhx3 mRNA, complete cds
Oryzias latipes LRH-1 LOC100049462	gi|157278392|ref|NM_001104828.1|	Oryzias latipes nuclear receptor subfamily 5 group A member 2 (nr5a2), mRNA_x0001_DQ132803.1 Oryzias latipes LRH-1 mRNA, complete cds
Oryzias latipes mfOR1 for olfactory receptor1	gi|5881567|dbj|AB022646.1|	Oryzias latipes mfOR1 gene for olfactory receptor 1, complete cds
Oryzias latipes mfOR2 for olfactory receptor2	gi|5881569|dbj|AB022647.1|	Oryzias latipes mfOR2 gene for olfactory receptor 2, complete cds
Oryzias latipes mfOR3 for olfactory receptor3	gi|5881571|dbj|AB022648.1|	Oryzias latipes mfOR3 gene for olfactory receptor 3, partial cds
Oryzias latipes mfOR4 for olfactory receptor4	gi|5881573|dbj|AB022649.1|	Oryzias latipes gene for Y2 olfactory receptor, complete cds
Oryzias latipes MHC classII antigen	gi|5852638|gb|AF134943.1|	Oryzias latipes MHC class II antigen gene, partial cds
Oryzias latipes NR5A1 1 of 2 LG9	ENSORLT00000020643	Oryzias latipes Nuclear hormone receptor 5a1, FTZ-F1 LG9:27816776-27835900:-1
Oryzias latipes NR5A1 on LG9	NM_001104696.1	Oryzias latipes nuclear receptor subfamily 5 group A member 1 (nr5a1), mRNA_x0001_AB016834.1 Oryzias latipes mRNA for FTZ-F1, complete cds
Oryzias latipes NR5A1a-201( 2 of 2) LG12	ENSORLT00000016541	Oryzias latipes Nuclear receptor subfamily 5, group A, member 1a [Source:ZFIN;Acc:ZDB-GENE-010504-1]
Oryzias latipes Ol-br-ad clone br4290 sequence	gi|12591259|gb|AU169190.1|AU169190AU169190	PREDICTED: Oryzias latipes dual specificity phosphatase 6 (dusp6), mRNA
Oryzias latipes Ol-vit1 vitellogenin1	gi|18143623|dbj|AB064320.1|	Oryzias latipes vitellogenin 1 (ol-vit1), mRNA_x0001_AB064320.1 Oryzias latipes Ol-vit1 mRNA for vitellogenin 1, complete cds
Oryzias latipes OlaDMRT5 for doublesex and mab-3-related TF5	gi|38141730|dbj|AB083691.1|	Oryzias latipes OlaDMRT5 gene for doublesex and mab-3 related transcription factor 5, complete cds
Oryzias latipes OlGCS-alpha2 for soluble guanylylcyclase alpha2 subunit	gi|30409731|dbj|AB109466.1|	Oryzias latipes OlGCS-alpha2 gene for soluble guanylyl cyclase alpha2 subunit, complete cds
Oryzias latipes OlPGRMC1 receptor membrane component1	gi|78771598|dbj|AB240046.1|	Oryzias latipes progesterone receptor membrane component 1 (pgrmc1), mRNA_x0001_AB240046.1 Oryzias latipes OlPGRMC1 mRNA for progestin receptor membrane component 1, complete cds
Oryzias latipes OlPGRMC1 receptor membrane component1	gi|78771600|dbj|AB240047.1|	Oryzias latipes OlPGRMC1 mRNA for progestin receptor membrane component 1, partial cds
Oryzias latipes OlPGRMC2 progestin receptor membrane component2 note:shortform	gi|78675272|dbj|AB239910.1|	Oryzias latipes OlPGRMC2 mRNA for progestin receptor membrane component 2, complete cds, note: short form
Oryzias latipes OlPGRMC2 receptor membrane component2 note:longform	gi|78675274|dbj|AB239911.1|	Oryzias latipes progesterone receptor membrane component 2 (pgrmc2), mRNA_x0001_AB239911.1 Oryzias latipes OlPGRMC2 mRNA for progestin receptor membrane component 2, complete cds, note: long form
Oryzias latipes Orla-UBA classica lMHC classI molecule alpha-chain strain:Hd-rR	gi|295901560|dbj|AB450999.1|	Oryzias latipes major histocompatibility complex class I-related gene protein-like (orla-uba), mRNA
Oryzias latipes Orla-UBA classical MHC classI molecule alpha-chain strain:AA2	gi|295901562|dbj|AB451000.1|	Oryzias latipes Orla-UBA mRNA for classical MHC class I molecule, alpha-chain, complete cds, strain: AA2
Oryzias latipes paired-likehomeodomainTF2a	gi|157410516|gb|EU048551.1|	Oryzias latipes paired like homeodomain 2 (pitx2), mRNA_x0001_EU048551.1 Oryzias latipes paired-like homeodomain transcription factor 2a mRNA, complete cds
Oryzias latipes partial for cold-shock domain protein mfYP2	gi|14270382|emb|AJ319580.1|	Oryzias latipes partial mRNA for cold-shock domain protein (mfYP2 gene)
Oryzias latipes proteasome subunit beta type10 psmb10	gi|297206691|ref|NM_001184953.1|	Oryzias latipes proteasome subunit, beta type 10 (psmb10), mRNA_x0001_AB450985.1 Oryzias latipes PSMB10 mRNA for proteasome subunit, beta type 10, complete cds, strain: HNI
Oryzias latipes Rad21 cohesin subunit Rad21	gi|41349741|dbj|AB115697.1|	Oryzias latipes RAD21 cohesin complex component (rad21), mRNA_x0001_AB115697.1 Oryzias latipes Rad21 mRNA for cohesin subunit Rad21, complete cds
Oryzias latipes SCP3 synaptonemal complex protein3	gi|51465795|dbj|AB162905.1|	Oryzias latipes synaptonemal complex protein 3 (scp3), mRNA_x0001_AB162905.1 Oryzias latipes SCP3 mRNA for synaptonemal complex protein 3,complete cds
Oryzias latipes SF1-like on Chr12	XM_011482028.1	PREDICTED: Oryzias latipes nuclear receptor subfamily 5 group A member 2-like (LOC101158123), mRNA
Oryzias latipes SMARC	ENSORLT00000015718	Oryzias latipes SWI/SNF related, matrix associated, actin dependent regulator of chromatin, cDNA
Oryzias latipes SMC1beta meiosis-specific cohesin subunit SMC1beta	gi|41349745|dbj|AB115699.1|	Oryzias latipes meiosis-specific cohesin subunit SMC1 beta (smc1b), mRNA_x0001_AB115699.1 Oryzias latipes SMC1 beta mRNA for meiosis-specific cohesin subunit SMC1 beta, complete cds
Oryzias latipes SMC3 cohesinsubunitSMC3	gi|41349743|dbj|AB115698.1|	Oryzias latipes SMC3 mRNA for cohesin subunit SMC3, partial cds
Oryzias latipes SOX3protein sox2	gi|157278265|ref|NM_001104764.1|	Oryzias latipes SOX3 protein (sox2), mRNA_x0001_AJ245396.1 Oryzias latipes mRNA for SOX3 protein
Oryzias latipes sox9 TFSOX9	gi|21727912|dbj|AB077756.1|	Oryzias latipes sox9 mRNA for transcription factor SOX9, complete cds
Oryzias latipes Sox9a2 HMGbo xTFSox9a2	gi|68445614|dbj|AB211148.1|	Oryzias latipes SRY-box 9 (sox9), mRNA_x0001_AB211148.1 Oryzias latipes Sox9a2 mRNA for HMG box transcription factor Sox9a2, complete cds
Oryzias latipes SPO11	gi|145910312|gb|EF530599.1|	Oryzias latipes SPO11 meiotic recombination protein mRNA, partial cds
Oryzias latipes SRY-box containing 10b sox10b	gi|227336643|gb|FJ895594.1|	PREDICTED: Oryzias latipes SRY (sex determining region Y)-box 10 (sox10), transcript variant X1, mRNA
Oryzias latipes SRY-box containing 11 sox11	gi|227336645|gb|FJ895595.1|	Oryzias latipes SRY-box containing gene 11 (sox11) mRNA, partial cds
Oryzias latipes SRY-box containing 13 sox13	gi|227336647|gb|FJ895596.1|	Oryzias latipes SRY-box containing gene 13 (sox13) mRNA, partial cds
Oryzias latipes SRY-box containing 14 sox14	gi|227336649|gb|FJ895597.1|	Oryzias latipes SRY-box 14 (sox14), mRNA_x0001_FJ895597.1 Oryzias latipes SRY-box containing gene 14 (sox14) mRNA, partial cds
Oryzias latipes SRY-box containing 17 sox17	gi|227336651|gb|FJ895598.1|	Oryzias latipes SRY-box 17 (sox17), mRNA_x0001_FJ895598.1 Oryzias latipes SRY-box containing gene 17 (sox17) mRNA, partial cds
Oryzias latipes SRY-box containing 18 sox18	gi|227336653|gb|FJ895599.1|	Oryzias latipes SRY-box containing gene 18 (sox18), mRNA_x0001_FJ895599.1 Oryzias latipes SRY-box containing gene 18 (sox18) mRNA, partial cds
Oryzias latipes SRY-box containing 1a sox1a	gi|227336629|gb|FJ895587.1|	Oryzias latipes SRY-box 1 (sox1), mRNA_x0001_FJ895587.1 Oryzias latipes SRY-box containing gene 1a (sox1a) mRNA, partial cds
Oryzias latipes SRY-box containing 2 sox2	gi|227336631|gb|FJ895588.1|	TPA_asm: Oryzias latipes strain Hd-rR, complete genome assembly, chromosome 4
Oryzias latipes SRY-box containing 21 sox21	gi|227336655|gb|FJ895600.1|	PREDICTED: Oryzias latipes SRY (sex determining region Y)-box 21 (sox21), transcript variant X1, mRNA
Oryzias latipes SRY-box containing 32 sox32	gi|227336657|gb|FJ895601.1|	PREDICTED: Oryzias latipes transcription factor Sox-17-alpha-A (LOC100304457), mRNA
Oryzias latipes SRY-box containing 4 sox4	gi|227336633|gb|FJ895589.1|	Oryzias latipes SRY-box 4 (sox4), mRNA_x0001_FJ895589.1 Oryzias latipes SRY-box containing gene 4 (sox4) mRNA, partial cds
Oryzias latipes SRY-box containing 6a sox6a	gi|227336635|gb|FJ895590.1|	Oryzias latipes SRY-box containing gene 6a (sox6a), mRNA_x0001_FJ895590.1 Oryzias latipes SRY-box containing gene 6a (sox6a) mRNA, partial cds
Oryzias latipes SRY-box containing 6b sox6b	gi|227336637|gb|FJ895591.1|	Oryzias latipes SRY-box containing gene 6b (sox6b), mRNA_x0001_FJ895591.1 Oryzias latipes SRY-box containing gene 6b (sox6b) mRNA, partial cds
Oryzias latipes SRY-box containing 7 sox7	gi|227336639|gb|FJ895592.1|	Oryzias latipes SRY-box 7 (sox7), mRNA_x0001_FJ895592.1 Oryzias latipes SRY-box containing gene 7 (sox7) mRNA, partial cds
Oryzias latipes SRY-box containing 8 sox8	gi|227336641|gb|FJ895593.1|	Oryzias latipes SRY-box 8 (sox8), mRNA_x0001_FJ895593.1 Oryzias latipes SRY-box containing gene 8 (sox8) mRNA, partial cds
Oryzias latipes Sry-box containing protein 9b Sox9b	gi|62082627|gb|AY870393.1|	Oryzias latipes Sry-box containing protein 9b (Sox9b) mRNA, complete cds
Oryzias latipes Sry-box containing protein9a Sox9a	gi|62082629|gb|AY870394.1|	Oryzias latipes Sry-box containing protein 9a (Sox9a) mRNA, complete cds
Oryzias latipes Sry-box containing protein9b sox9b	gi|157311662|ref|NM_001105086.1|	Oryzias latipes SRY-box 9 (sox9), mRNA_x0001_AB211148.1 Oryzias latipes Sox9a2 mRNA for HMG box transcription factor Sox9a2, complete cds
Oryzias latipes strain Carbio DMRT1	gi|15592934|gb|AF319994.1|	Oryzias latipes strain Carbio DMRT1 mRNA, complete cds
Oryzias latipes strain Carbio DMRT2	gi|15592928|gb|AF319992.1|	Oryzias latipes strain Carbio DMRT2 gene, partial cds
Oryzias latipes strain Carbio male sex-determining protein DMRT1Y	gi|22795028|gb|AY129240.1|	Oryzias latipes strain Carbio male sex-determining protein (DMRT1Y) mRNA, complete cds
Oryzias latipes strain Carbio myosin heavy chain-like protein and DMRT1 s	gi|15592924|gb|AF319991.1|	Oryzias latipes strain Carbio myosin heavy chain-like protein and DMRT1 genes, partial cds
Oryzias latipes strain HN Imale sex-determining protein DMRT1Y DMRT1Y-HN Iallele	gi|22795030|gb|AY129241.1|	Oryzias latipes strain HNI male sex-determining protein (DMRT1Y) gene, DMRT1Y-HNI allele, complete cds
Oryzias latipes strain Kaga DMRT3	gi|15592931|gb|AF319993.1|	Oryzias latipes strain Kaga DMRT3 gene, partial cds
Oryzias latipes SUMO WDR74	ENSORLT00000025257	wing disc repeat domain 74 (wdr74)
Oryzias latipes SYCP1 synaptonemal complexprotein1	gi|118722288|dbj|AB207974.2|	Oryzias latipes synaptonemal complex protein 1 (sycp1), mRNA_x0001_AB207974.2 Oryzias latipes SYCP1 mRNA for synaptonemal complex protein 1,complete cds
Oryzias latipes TAP-binding protein tapbp	gi|319996714|ref|NM_001201519.1|	Oryzias latipes TAP binding protein (tapbp), mRNA_x0001_AB450990.1 Oryzias latipes TAPBP, TAPBP mRNA for TAP-binding protein, complete cds, strain: HNI
Oryzias latipes TFSOX9 sox9	gi|157311660|ref|NM_001105085.1|	Oryzias latipes transcription factor SOX9 (sox9), mRNA_x0001_AB078924.1 Oryzias latipes sox9 mRNA for SOX9 longer form, complete cds
Oryzias latipes thrb-201	ENSORLT00000010193	Oryzias latipes Thyroid hormone receptor beta [Source:RefSeq peptide;Acc:NP_001098160]
Oryzias latipes tissue-type ovary anti-mullerian hormone amh	gi|58802924|gb|AY899283.1|	Oryzias latipes anti-muellerian hormone precursor (AMH) mRNA, complete cds
Oryzias latipes tissue-type testes anti-mullerian hormone amh	gi|58802922|gb|AY899282.1|	Oryzias latipes anti-muellerian hormone precursor (AMH) mRNA, complete cds
Oryzias latipes TRa mRNA	ENSORLT00000021194	Oryzias latipes Thyroid hormone receptor alpha a [Source:ZFIN;Acc:ZDB-GENE-990415-263]
Oryzias latipes Tra2a transformer-2a	gi|22022312|dbj|AB079121.1|	Oryzias latipes Tra2a mRNA for transformer-2a, complete cds
Oryzias latipes Tra2a2 transformer-2a2	gi|49204523|dbj|AB159268.1|	Oryzias latipes Tra2a2 mRNA for transformer-2a2, complete cds
Oryzias latipes Tra2a3 transformer-2a3	gi|49204528|dbj|AB159269.1|	Oryzias latipes Tra2a3 mRNA for transformer-2a3, complete cds
Oryzias latipes Tra2a4 transformer-2a4	gi|49204533|dbj|AB159270.1|	Oryzias latipes transformer 2a (tra2a), mRNA_x0001_AB159270.1 Oryzias latipes Tra2a4 mRNA for transformer-2a4, complete cds
Oryzias latipes Tra2b transformer-2b	gi|22022314|dbj|AB079122.1|	Oryzias latipes Tra2b mRNA for transformer-2b, complete cds
Oryzias latipes Tra2b2 transformer-2b2	gi|49204537|dbj|AB159271.1|	Oryzias latipes transformer 2b (tra2b), transcript variant 2, mRNA_x0001_AB159271.1 Oryzias latipes Tra2b2 mRNA for transformer-2b2, complete cds
Oryzias latipes Tra2b3 transformer-2b3	gi|49204542|dbj|AB159272.1|	Oryzias latipes Tra2b3 mRNA for transformer-2b3, complete cds
Oryzias latipes Tra2b4 transformer-2b4	gi|49204550|dbj|AB159273.1|	Oryzias latipes Tra2b4 mRNA for transformer-2b4, complete cds
Oryzias latipes Tra2b5 transformer-2b5	gi|49204554|dbj|AB159274.1|	Oryzias latipes transformer 2b (tra2b), transcript variant 5, mRNA_x0001_AB159274.1 Oryzias latipes Tra2b5 mRNA for transformer-2b5, complete cds
Oryzias latipes Tra2b6 transformer-2b6	gi|49204562|dbj|AB159275.1|	Oryzias latipes Tra2b6 mRNA for transformer-2b6, complete cds
Oryzias latipes Tra2b7 transformer-2b7	gi|49204566|dbj|AB159276.1|	Oryzias latipes Tra2b7 mRNA for transformer-2b7, complete cds
Oryzias latipes transformer2a tra2a	gi|157278156|ref|NM_001104708.1|	Oryzias latipes transformer 2a (tra2a), mRNA_x0001_AB159270.1 Oryzias latipes Tra2a4 mRNA for transformer-2a4, complete cds
Oryzias latipes transformer2b tra2b transcript variant2	gi|157279826|ref|NM_001104957.1|	Oryzias latipes transformer 2b (tra2b), transcript variant 2, mRNA_x0001_AB159271.1 Oryzias latipes Tra2b2 mRNA for transformer-2b2, complete cds
Oryzias latipes transformer2b tra2b transcript variant5	gi|157278158|ref|NM_001104709.1|	Oryzias latipes transformer 2b (tra2b), transcript variant 5, mRNA_x0001_AB159274.1 Oryzias latipes Tra2b5 mRNA for transformer-2b5, complete cds
Oryzias latipes TRb	ENSORLT00000010195	Thyroid hormone receptor beta [Source:RefSeq peptide;Acc:NP_001098160]
Oryzias latipes TSHR	XM_011482078.1	PREDICTED: Oryzias latipes thyrotropin receptor-like (LOC101170361), mRNA
Oryzias latipes Tyr for tyrosinase	gi|6045182|dbj|AB032694.1|	Oryzias latipes Tyr gene for tyrosinase, partial cds
Oryzias latipes UCA MHC classI antigen	gi|15375079|dbj|AB033381.1|	Oryzias latipes class I histocompatibility antigen, F10 alpha chain-like (LOC101170062), mRNA_x0001_AB033381.1 Oryzias latipes UCA mRNA for MHC class I antigen, complete cds
Oryzias latipes WDR34-201	ENSORLT00000015999	Oryzias latipes wing disc WD repeat domain 34 [Source:ZFIN;Acc:ZDB-GENE-070928-9]
Oryzias latipes wingless-type MMTV integration site family member4a wnt4a	gi|238053980|ref|NM_001160439.1|	Oryzias latipes Wnt family member 4 (wnt4), mRNA_x0001_FJ236308.1 Oryzias latipes wingless-type MMTV integration site family member 4a (wnt4a) mRNA, complete cds
Oryzias latipes wingless-type MMTV integration site family member4b wnt4b	gi|238053982|ref|NM_001160440.1|	Oryzias latipes wingless-type MMTV integration site family member 4b (wnt4b), mRNA_x0001_FJ236309.1 Oryzias latipes wingless-type MMTV integration site family member 4b (wnt4b) mRNA, complete cds
Oryzias latipes wt1 Wilms'tumor suppressor1	gi|22506634|dbj|AB070576.1|	Oryzias latipes Wilms' tumor suppressor 1 (wt1), mRNA_x0001_AB070576.1 Oryzias latipes wt1 mRNA for Wilms' tumor suppressor 1, complete cds
Oryzias latipes ZDHHC12 Oryzias latipes LG12	ENSORLT00000015904	Oryzias latipes zinc finger, DHHC-type containing 12 (zdhhc12)
Oryzias latipes zinc finger TF DMRT1a	gi|28950671|gb|AY157712.1|	Oryzias latipes putative zinc finger transcription factor (DMRT1a) gene, complete cds
Oryzias latipescyp19b promoter region and 5'UTR	gi|146229318|gb|AY705086.2|	Oryzias latipes brain aromatase (cyp19b) gene, promoter region and 5' UTR
Oryzias luzonensis Dmrt1 doublesex and mab-3-related TF1	gi|219567005|dbj|AB428666.1|	Oryzias luzonensis Dmrt1 mRNA for doublesex and mab-3 related transcription factor 1, complete cds
Oryzias luzonensis Foxl2 forkheadboxL2	gi|219567003|dbj|AB428665.1|	Oryzias luzonensis Foxl2 mRNA for forkhead box L2, complete cds
Oryzias luzonensis Sox9a2 HMGboxTFSox9a2	gi|219567001|dbj|AB428664.1|	Oryzias luzonensis Sox9a2 mRNA for HMG box transcription factor Sox9a2, complete cds
Oryzias luzonensis Tyr for Tyrosinase	gi|6045186|dbj|AB032696.1|	Oryzias luzonensis Tyr gene for Tyrosinase, partial cds
Oryzias luzonensis zinc finger TF DMRT1	gi|46393828|gb|AY521021.1|	Oryzias luzonensis putative zinc finger transcription factor DMRT1 (dmrt1) mRNA, complete cds
Oryzias marmoratus zinc finger TF DMRT1	gi|46393831|gb|AY521023.1|	Oryzias marmoratus putative zinc finger transcription factor DMRT1 (dmrt1) mRNA, complete cds
Oryzias mekongensis zinc finger TF DMRT1	gi|46393826|gb|AY521020.1|	Oryzias mekongensis putative zinc finger transcription factor DMRT1 (dmrt1) mRNA, complete cds
Oryzias melastigma Tyr for Tyrosinase	gi|6045188|dbj|AB032697.1|	Oryzias melastigma Tyr gene for Tyrosinase, partial cds
Oryzias sinensis choriogenin L	gi|54399793|gb|AY758411.1|	Oryzias sinensis choriogenin L mRNA, complete cds
Poecilia reticulata marker 1025 Cumaná zaBac34-2 F01	FH893550.1	Poecilia reticulata Cumaná genomic clone zaBac34-2_F01
Poecilia reticulata Tra_Embryo_15B16 Silver pmel17	ES387143.1	Poecilia reticulata cDNA clone Tra_Embryo_15B16 for premelanosome protein Pmel17/Silver
Poecilia reticulata 6PTHS	AY034101.1	Poecilia reticulata 6-pyruvoyl tetrahydropterin synthase mRNA, complete cds
Poecilia reticulata AldolaseB	EF408836.1	Poecilia reticulata aldolase B mRNA, complete cds
Poecilia reticulata alpha actin Tra_Embryo_6_I08 alpha actin	ES372463.1	Poecilia reticulata cDNA clone Tra_Embryo_6_I08 for alpha actin
Poecilia reticulata beta Actin	EU143772.1	Poecilia reticulata beta-actin mRNA, complete cds
Poecilia reticulata CK1	EF408826.1	Poecilia reticulata creatine kinase 1 mRNA, complete cds
Poecilia reticulata comp71731 c0 seq1 len=2378	PRJNA230881	Poecilia reticulata transcriptome, asparaginyl-tRNA synthetase (nars)
Poecilia reticulata comp76657 c0 seq1 len=4735	PRJNA230881	Poecilia reticulata transcriptome, titin-like (LOC103473921), transcript, partial
Poecilia reticulata comp9893 c0 seq1 len=497	PRJNA230881	Poecilia reticulata transcriptome, leucine-zipper-like transcriptional regulator 1 (LOC108166764)
Poecilia reticulata csf1r	NM_001297470.1	Poecilia reticulata colony stimulating factor 1 receptor (csf1r) mRNA
Poecilia reticulata csf1ra	KC143122.1	Poecilia reticulata colony-stimulating factor 1 receptor a (csf1ra) mRNA, complete cds
Poecilia reticulata CyclinG1	EF408837	Poecilia reticulata cyclin G1 mRNA, complete cds
Poecilia reticulata EF1a	EF408829.1	Poecilia reticulata EF 1 alpha mRNA, partial cds
Poecilia reticulata grOpsin RH2 1	DQ234859.1	Poecilia reticulata green-sensitive opsin 1 (RH2-1) mRNA, complete cds
Poecilia reticulata grOpsin RH2-2	DQ234858.1	Poecilia reticulata green-sensitive opsin 2 (RH2-2) mRNA, complete cds
Poecilia reticulata Growth Hormone	U63805.1	Poecilia reticulata growth hormone (GH) gene, partial cds
Poecilia reticulata HSP70	AB298594.2	Poecilia reticulata mRNA for HSP70 protein, complete cds
Poecilia reticulata intersex-like protein	gi|220172133|gb|FJ236238.1|	Poecilia reticulata intersex-like protein gene, partial cds
Poecilia reticulata janusA	gi|220172131|gb|FJ236237.1|	Poecilia reticulata janus A gene, partial cds
Poecilia reticulata kit	NM_001297466.1	Poecilia reticulata KIT proto-oncogene receptor tyrosine kinase (kit), mRNA
Poecilia reticulata kit lg	NM_001297464.1	Poecilia reticulata KIT ligand (kitlg), mRNA.
Poecilia reticulata kita	NM_001297466.1	Poecilia reticulata KIT proto-oncogene receptor tyrosine kinase (kit), mRNA_x0001_KC143124.1 Poecilia reticulata c-kit receptor (kita) mRNA, complete cds
Poecilia reticulata kita mutants exon intron	KC143126.1	Poecilia reticulata nonfunctional c-kit receptor (kita) gene, kita-golden allele, partial sequence
Poecilia reticulata LWS A180	HQ260675.1	Poecilia reticulata LWS A180 opsin mRNA, complete cds
Poecilia reticulata LWS P180 exons2 to end	HQ260676.1	Poecilia reticulata LWS P180 opsin mRNA, partial cds
Poecilia reticulata LWS S180	HQ260677.1	Poecilia reticulata LWS S180 opsin mRNA, complete cds
Poecilia reticulata LWS S180r	HQ260676.1	Poecilia reticulata LWS P180 opsin mRNA, partial cds
Poecilia reticulata LWSopsin Oro_6-4_D09 cDNA	DQ168660.1	Poecilia reticulata cDNA clone OR6_4_D09 LWS long wave-sensitive opsin mRNA, complete cds
Poecilia reticulata LWSopsin Qua_Emb_5_L06	DQ168661.1	Poecilia reticulata cDNA clone Qua_Emb_5_L06 LWS long wave-sensitive opsin mRNA, complete cds
Poecilia reticulata marker 708 Cumaná zaBac01-3 B01	FH891315.1	Poecilia reticulata Cumaná genomic clone zaBac01-3_B01
Poecilia reticulata marker 847 Cumaná zaBac04 G16	FH892245.1	Poecilia reticulata Cumaná genomic clonezaBac04_G16
Poecilia reticulata MC1R	FJ200251.1	Poecilia reticulata melanocortin 1 receptor gene, partial cds
Poecilia reticulata MC1R	FJ200251.1	Poecilia reticulata melanocortin 1 receptor gene, partial cds.
Poecilia reticulata MC1R long mRNA	AB563501.1	Poecilia reticulata MC1R gene for melanocortin 1 receptor, complete cds
Poecilia reticulata MC4R	FJ236224	Poecilia reticulata melanocortin 4 receptor gene, partial cds
Poecilia reticulata Mc4r FJ236224, partial cds	FJ236224.1	melanocortin 4 receptor gene
Poecilia reticulata Mhc ClassIA	gi|976111|emb|Z54085.1|	Poecilia reticulata Mhc gene, Class IA
Poecilia reticulata MITF	DQ864735	Poecilia reticulata microphthalmia-associated transcription factor mRNA, complete cds
Poecilia reticulata Opsin SWS2A	JF303638.1	Poecilia reticulata short-wavelength sensitive opsin type 2A (SWS2A) mRNA, complete cds
Poecilia reticulata Oro_Skin_4_J03 PHP	ES384774.1	Poecilia reticulat acDNA clone Oro_Skin_4_J03 for phosphohistidine phosphatase 1 (phpt1)
Poecilia reticulata PGK	EF408827.1	Poecilia reticulata phosphoglycerate kinase mRNA, partial cds
Poecilia reticulata Qua_Embryo_U4_B11 alpha actin	ES380732.1	Poecilia reticulata cDNA clone for alpha-actin
Poecilia reticulata Rhodopsin	DQ912023.1	Poecilia reticulata strain Quare 6 rhodopsin mRNA, complete cds
Poecilia reticulata SLC24a5	FJ236221.1	solute carrier family 24 member 5 mRNA, partial cds
Poecilia reticulata sox 9	DQ683727.1	Poecilia reticulata Sox9 (Sox9) mRNA, complete cds
Poecilia reticulata Sox9 Sox9	gi|110611205|gb|DQ683727.1|	Poecilia reticulata SRY-box 9 (sox9), mRNA_x0001_DQ683727.1 Poecilia reticulata Sox9 (Sox9) mRNA, complete cds
Poecilia reticulata SWS2Bopsin	DQ234860.1	Poecilia reticulata violet/blue-sensitive opsin (SWS2B) mRNA, complete cds
Poecilia reticulata Thioredoxin Oro_Skin_4_O13	ES384849.1	Poecilia reticulata cDNA clone Oro_Skin_4_O13 5 for thioredoxin
Poecilia reticulata TPI EF408833	NM_001328623.1	triose phosphate isomerase B mRNA, complete cds
Poecilia reticulata Tra_Embryo_6_D04 cDNA	ES372365.1	Poecilia reticulata cDNA clone for Potassium voltage-gated channel subfamily H member 1
Poecilia reticulata Tra_Liver_7-4_H05 cDNA PHP14kD	ES377437.1	Poecilia reticulata cDNA clone Tra_Liver_7-4_H05 for phosphohistidine phosphatase PHP 14kD
Poecilia reticulata Trp2 Tra Embryo 4-2 F01	ES373568.1	Poecilia reticulata cDNA clone for dopachrome tautomerase (dct)
Poecilia reticulata TXNL 2 marker Cumana, glrx3	gb|ES371585|	glutaredoxin 3 (glrx3)
Poecilia reticulata Tyrosinase	FJ154965.1	Poecilia reticulata tyrosinase (tyra) gene, partial cds
Poecilia reticulata UV opsin SWS1	DQ234861.1	Poecilia reticulata short wave-sensitive 1 opsin (SWS1) mRNA, complete cds
Salmo salar ATP-binding cassette sub-familyB MDR TAP member3 abcb3	gi|213511525|ref|NM_001140074.1|	Salmo salar ATP-binding cassette, sub-family B (MDR/TAP), member 3 (abcb3), mRNA_x0001_BT045188.1 Salmo salar clone ssal-rgf-514-169 Antigen peptide transporter 2 putative mRNA, complete cds
Salmo salar clonessal-evd-565-263Mediator of RNA polymeraseII transcription subunit 29	gi|221222091|gb|BT057835.1|	Salmo salar clone ssal-evd-565-263 Mediator of RNA polymerase II transcription subunit 29 putative mRNA, complete cds
Salmo salar clonessal-evf-514-171Tyrosine-protein kinaseJak1	gi|221222125|gb|BT057852.1|	Salmo salar clone ssal-evf-514-171 Tyrosine-protein kinase Jak1 putative mRNA, complete cds
Salmo salar clonessal-evf-559-30014kDa phosphohistidine phosphatase	gi|209731959|gb|BT047048.1|	Salmo salar clone ssal-evf-559-300 14 kDa phosphohistidine phosphatase putative mRNA, complete cds
Salmo salar clonessal-lksf-001-052Mediator of RNA polymeraseII transcription subunit 29	gi|221221861|gb|BT057720.1|	Salmo salar clone ssal-lksf-001-052 Mediator of RNA polymerase II transcription subunit 29 putative mRNA, complete cds
Salmo salar clonessal-rgf-506-129EGF-containingf ibulin-like extra cellular matrix protein 2precursor	gi|223647579|gb|BT058835.1|	Salmo salar clone ssal-rgf-506-129 EGF-containing fibulin-like extracellular matrix protein 2 precursor putative mRNA, complete cds
Salmo salar clonessal-rgf-526-334 Dual specificity protein phosphatase7	gi|223648161|gb|BT059126.1|	Salmo salar clone ssal-rgf-526-334 Dual specificity protein phosphatase 7 putative mRNA, complete cds
Salmo salar clonessal-rgf-537-204TFSOX-9	gi|223648433|gb|BT059262.1|	Salmo salar clone ssal-rgf-537-204 Transcription factor SOX-9 putative mRNA, complete cds
Salmo salar clonessal-rgf-538-177EGF-containingf ibulin-like extra cellular matrix protein 2precursor	gi|209156029|gb|BT045985.1|	Salmo salar clone ssal-rgf-538-177 EGF-containing fibulin-like extracellular matrix protein 2 precursor putative mRNA, complete cds
Salmo salar doublesex and mab-3-related TF2b dmrt2b	gi|213512183|ref|NM_001139597.1|	Salmo salar doublesex and mab-3 related transcription factor 2b (dmrt2b), mRNA_x0001_BT043517.1 Salmo salar clone HM4_1114 doublesex- and mab-3-related transcription factor 2b-like (dmrt2b) mRNA, complete cds
Salmo salar Dual specificit yprotein phosphatase6 dus6	gi|259155195|ref|NM_001165367.1|	Salmo salar Dual specificity protein phosphatase 6 (dus6), mRNA_x0001_BT058876.1 Salmo salar clone ssal-rgf-509-353 Dual specificity protein phosphatase 6 putative mRNA, complete cds
Salmo salar Dual specificity protein phosphatase7 dus7	gi|226443377|ref|NM_001146676.1|	Salmo salar Dual specificity protein phosphatase 7 (dus7), mRNA_x0001_BT057362.1 Salmo salar clone ssal-eve-537-029 Dual specificity protein phosphatase 7 putative mRNA, complete cds
Salmo salar fibulin4 fbln4	gi|213513555|ref|NM_001140059.1|	Salmo salar fibulin 4 (fbln4), mRNA_x0001_BT045156.1 Salmo salar clone ssal-rgf-513-249 EGF-containing fibulin-like extracellular matrix protein 2 precursor putative mRNA, complete cds
Salmo salar Makorin 2 mkrn2 mRNA, complete cds	NM_001173723.1	Makorin ring finger protein 2 (mkrn2)
Silurus meridionalis doublesex Mab-3 related TF1b Dmrt1 alternatively spliced	gi|121485014|gb|EF015488.1|	Silurus meridionalis doublesex/Mab-3 related transcription factor 1b (Dmrt1) mRNA, complete cds, alternatively spliced
Silurus meridionalis doublesex Mab3 related TF1a Dmrt1 alternatively spliced	gi|121485012|gb|EF015487.1|	Silurus meridionalis doublesex/Mab-3 related transcription factor 1a (Dmrt1) mRNA, complete cds, alternatively spliced
Silurus meridionalis forkheadTFL2 Foxl2	gi|118175968|gb|EF015396.1|	Silurus meridionalis forkhead transcription factor L2 (Foxl2) mRNA, complete cds
Sparus aurata csf1r mRNA	AM050293.1	Sparus aurata mRNA for macrophage colony stimulating factor receptor (csf1r gene)
Squalius alburnoides Dax-1	gi|254688336|gb|FJ587499.1|	Squalius alburnoides Dax-1 mRNA, partial cds
Squalius alburnoides factor in the germline alpha	gi|254688340|gb|FJ587501.1|	Squalius alburnoides factor in the germline alpha mRNA, partial cds
Squalius pyrenaicus Dax-1	gi|254688334|gb|FJ587498.1|	Squalius pyrenaicus Dax-1 mRNA, partial cds
Squalius pyrenaicus factor in the germline alpha	gi|254688338|gb|FJ587500.1|	Squalius pyrenaicus factor in the germline alpha mRNA, partial cds
Squalius pyrenaicus Wilms'tumorsuppressor wt1	gi|254688332|gb|FJ587497.1|	Squalius pyrenaicus Wilms' tumor suppressor (wt1) mRNA, partial cds
Suberites domuncula mRNA for fem-like sex-differentiation protein fem1L	gi|57282785|emb|AJ620109.1|	Suberites domuncula mRNA for fem-like sex-differentiation protein (fem1L gene)
Takifugu rubripes doublesex and mab-3-related TF1 dmrt1	gi|83817000|ref|NM_001037949.1|	Takifugu rubripes doublesex and mab-3 related transcription factor 1 (dmrt1), mRNA_x0001_AB201461.1 Takifugu rubripes mRNA for DMRT1 protein, complete cds
Takifugu rubripes doublesex and mab-3-related TF2 dmrt2	gi|83816994|ref|NM_001037946.1|	Takifugu rubripes doublesex and mab-3 related transcription factor 2 (dmrt2), mRNA_x0001_AB201462.1 Takifugu rubripes mRNA for DMRT2a protein, complete cds
Takifugu rubripes doublesex and mab-3-related TF3 dmrt3	gi|83816992|ref|NM_001037945.1|	Takifugu rubripes doublesex and mab-3 related transcription factor 3 (dmrt3), mRNA_x0001_AB201463.1 Takifugu rubripes mRNA for DMRT3 protein, complete cds
Takifugu rubripes doublesex and mab-3-related TF4 dmrt4	gi|83817006|ref|NM_001037948.1|	Takifugu rubripes DMRT like family A1 (dmrta1), mRNA_x0001_AB201464.1 Takifugu rubripes mRNA for DMRT4 protein, complete cds
Takifugu rubripes doublesex and mab-3-related TF5 dmrt5	gi|83816998|ref|NM_001037950.1|	Takifugu rubripes doublesex and mab-3 related transcription factor 5 (dmrt5), mRNA_x0001_AB201465.1 Takifugu rubripes mRNA for DMRT5 protein, complete cds
Takifugu rubripes dual specificity phosphatase6 dusp6	gi|281371390|ref|NM_001170353.1|	Takifugu rubripes dual specificity phosphatase 6 (dusp6), mRNA
Takifugu rubripes TFSox1b Sox1b	gi|33415913|gb|AY277951.1|	Takifugu rubripes transcription factor Sox1b (Sox1b) gene, complete cds
Takifugu rubripes TFSox3 Sox3	gi|33415917|gb|AY277953.1|	Takifugu rubripes transcription factor Sox3 (Sox3) gene, complete cds
Takifugu rubripes TFSox9a Sox9a	gi|33415939|gb|AY277964.1|	Takifugu rubripes transcription factor Sox9a (Sox9a) gene, complete cds
Tetraodon nigroviridis sex-specificTF DMRT1 alternatively spliced	gi|25989744|gb|AY152820.1|	Tetraodon nigroviridis sex-specific transcription factor DMRT1 mRNA, complete cds, alternatively spliced
Tetraodon nigroviridis sex-specificTF DMRT1;alternatively spliced	gi|23345006|gb|AY135175.1|	Tetraodon nigroviridis sex-specific transcription factor DMRT1 mRNA, complete cds; alternatively spliced
Tilapia mossambica glycoprotein alpha subunit	gi|10946372|gb|AF303087.1|	Tilapia mossambica glycoprotein alpha subunit mRNA, partial cds
Xiphophorus hellerii fibroblast growth factor 20a	gi|169246845|gb|EU340807.1|	Xiphophorus hellerii fibroblast growth factor 20a mRNA, partial cds
Xiphophorus maculatus FoxO5 alternatively spliced	gi|15072496|gb|AY040320.1|	Xiphophorus maculatus forkhead box O3 (foxo3), mRNA_x0001_AY040320.1 Xiphophorus maculatus forkhead protein FoxO5 (FoxO5) mRNA, complete cds, alternatively spliced
Xiphophorus maculatus 163A ZF1 (Zf1) 1	gi|532082|gb|U12777.1|	Xiphophorus maculatus 163A ZF1 (Zf1) gene, complete cds
Xiphophorus maculatus DM-domain containingTFDMRT2 DMRT2	gi|19070560|gb|AF350428.1|	Xiphophorus maculatus DM-domain containing transcription factor DMRT2 (DMRT2) gene, complete cds
Xiphophorus maculatus DM-domain containingTFDMRT4 DMRT4	gi|19070558|gb|AF350427.1|	Xiphophorus maculatus DM-domain containing transcription factor DMRT4 (DMRT4) gene, complete cds
Xiphophorus maculatus DMRT1TF	gi|24943243|gb|AF529187.1|	Xiphophorus maculatus doublesex- and mab-3-related transcription factor 1-like (LOC102216695), mRNA_x0001_AF529187.1 Xiphophorus maculatus DMRT1 transcription factor mRNA, complete cds
Xiphophorus maculatus DnMT, mRNA, complete cds	AF152342.1	Xiphophorus maculatus x Xiphophorus helleri DNA-(cytosine-5)-methyltransferase (dnmt-1) mRNA, complete cds
Xiphophorus maculatus doublesex-and mab-3-related TF5 dmrt5	gi|84646320|gb|DQ335470.1|	Xiphophorus maculatus doublesex- and mab-3-related transcription factor 5 (dmrt5) gene, complete cds
Xiphophorus maculatus EGFlGF GU144293	NM_001286291.1	heparin-binding EGF-like growth factor (hbegf)
Xiphophorus maculatus FOXO5 AY040320.1 mRNA	NM_001286287.1	forkhead protein FoxO5 (FoxO5)
Xiphophorus maculatus GADD45g mRNA	ENSXMAT00000016592	Xiphophorus maculatus Growth arrest and DNA damage inducible gamma [Source:HGNC Symbol;Acc:HGNC:4097]
Xiphophorus maculatus HASI mRNA	U43331.1	Xiphophorus maculatus HASI mRNA, complete cds
Xiphophorus maculatus HSC70 AB062115 mRNA	NM_001286281.1	heat shock cognate 70 (hsc70), stress protein
Xiphophorus maculatus isolate X1 tyrosine kinase XSRC	gi|472753|gb|U06609.1|	Xiphophorus maculatus isolate X1 tyrosine kinase (XSRC) gene, partial cds_x0001_U06610.1 Xiphophorus maculatus isolate X6 tyrosine kinase (XSRC) gene,partial cds
Xiphophorus maculatus isolate X6 tyrosine kinase XSRC	gi|472755|gb|U06610.1|	Xiphophorus maculatus isolate X1 tyrosine kinase (XSRC) gene, partial cds_x0001_U06610.1 Xiphophorus maculatus isolate X6 tyrosine kinase (XSRC) gene,partial cds
Xiphophorus maculatus linkage group XIIImarker XD0002	gi|604372|gb|U17903.1|	Xiphophorus maculatus linkage group XIII marker XD0002
Xiphophorus maculatus Makorin HQ377193	NM_001286297.1	Xiphophorus maculatus probable E3 ubiquitin-protein ligase makorin-1-like (LOC102218872)
Xiphophorus maculatus MC4R JNV, mRNA, complete cds	KF650653.1	melanocortin receptor type 4 (mc4r)
Xiphophorus maculatus MHC classII beta chain Xima-DXB Xima-DXB*01allele	gi|2961100|gb|AF040762.1|	Xiphophorus maculatus MHC class II beta chain Xima-DXB (Xima-DXB*01 allele) gene, complete cds
Xiphophorus maculatus MITFB, mRNA, complete cds	AF475091.1	Xiphophorus maculatus x Xiphophorus helleri microphtalmia-associated transcription factor MITF-B
Xiphophorus maculatus MPR300	AJ278449.1	Xiphophorus maculatus x Xiphophorus helleri partial mRNA for mannose-6-phosphate receptor (mpr300 gene)
Xiphophorus maculatus receptor tyrosine kinase egfrb promoter and partial ;and Jule retrotransposon sequence	gi|34762037|gb|AY298856.1|	Xiphophorus maculatus receptor tyrosine kinase (egfrb) gene, promoter and partial cds; and Jule retrotransposon sequence
Xiphophorus maculatus retrotransposon Rex3a reverse transcriptase RTpseudo completesequence	gi|6625648|gb|AF125981.1|	Xiphophorus maculatus retrotransposon Rex3a reverse transcriptase (RT) pseudogene, complete sequence
Xiphophorus maculatus retrotransposon Rex6 reverse transcriptase pseudo partial sequence	gi|12407656|gb|AF286191.1|	Xiphophorus maculatus retrotransposon Rex6 reverse transcriptase pseudogene, partial sequence
Xiphophorus maculatus rk oncogen exons 12 13 14 and15 and	gi|4063688|gb|AF091399.1|	Xiphophorus maculatus Xmrk oncogene gene, exons 12/13, 14, and 15, and partial cds
Xiphophorus maculatus rk proto-oncogen receptor tyrosine kinase	gi|65280|emb|X56317.1|	Xiphophorus maculatus Xmrk(proto-oncogene) gene for receptor tyrosine kinase
Xiphophorus maculatus rk X-chromosomal receptor tyrosine kinase	gi|65282|emb|X56318.1|	Xiphophorus maculatus Xmrk(X-chromosomal copy) gene for receptor tyrosine kinase
Xiphophorus maculatus rk Y-chromosomalreceptor tyrosine kinase	gi|65284|emb|X56319.1|	Xiphophorus maculatus Xmrk(Y-chromosomal copy) gene for receptor tyrosine kinase
Xiphophorus maculatus spin2B intron 1	ENSXMAG00000011733:ENSXMAT00000011776	Xiphophorus maculatus spindlin 2B JH557267.1:19686-28051:1, intron1
Xiphophorus maculatus Spindlin2 cdna	ENSXMAG00000011733:ENSXMAT00000011776	Xiphophorus maculatus spindlin-1-like (LOC102228860) mRNA
Xiphophorus maculatus strain DrLi mut receptor tyrosine kinase rk	gi|4139174|gb|AF092692.1|	Xiphophorus maculatus strain DrLi(mut) receptor tyrosine kinase Xmrk (Xmrk) gene, exons 12/13, 14 and 15 and partial cds
Xiphophorus maculatus strain Jp163B cholinergic receptor nicotinic delta polypeptide CHRND	gi|88604463|gb|DQ333447.1|	Xiphophorus maculatus strain Jp 163 B cholinergic receptor nicotinic delta polypeptide (CHRND) gene, partial cds
Xiphophorus maculatus strain Jp163B sex-linkedsequence XD0266	gi|88604471|gb|DQ333451.1|	Xiphophorus maculatus strain Jp 163 B sex-linked sequence XD0266
Xiphophorus maculatus strain Sb receptor tyrosine kinase rk	gi|4139178|gb|AF092694.1|	Xiphophorus maculatus strain Sb receptor tyrosine kinase Xmrk (Xmrk) gene, exons 7 and 8 and partial cds
Xiphophorus maculatus strain Sr receptor tyrosine kinase rk	gi|4139176|gb|AF092693.1|	Xiphophorus maculatus strain Sr receptor tyrosine kinase Xmrk (Xmrk) gene, partial cds
Xiphophorus maculatus transposon HelitronHel Hel	gi|77955945|gb|DQ221693.1|	Xiphophorus maculatus transposon Helitron Hel (Hel) gene, complete cds
Xiphophorus maculatus Tumor Protein AF043947 mRNA	NM_001286289.1	Xiphophorus maculatus tumor protein p53 (tp53),
Xiphophorus maculatus U34751 p53 p53	gi|1223854|gb|U34751.1|	Xiphophorus maculatus p53 (p53) gene, partial cds
Xiphophorus maculatus Zisupton JN255571.1 mRNA	NM_001286305.1	Xiphophorus maculatus uncharacterized LOC102220758 (zisupton), transposable element
